# Supplementary material for: Heat Shock Proteins 70 Regulate Cell Motility and Invadopodia-Associated Proteins Expression in Oral Squamous Cell Carcinoma
Source: PubMed Central journal article supplement (PMC9362981; doi:10.3389/fendo.2022.890218), 2022-07-26
Supplement: DataSheet_2.pdf [file DataSheet_2.pdf]

HSP70

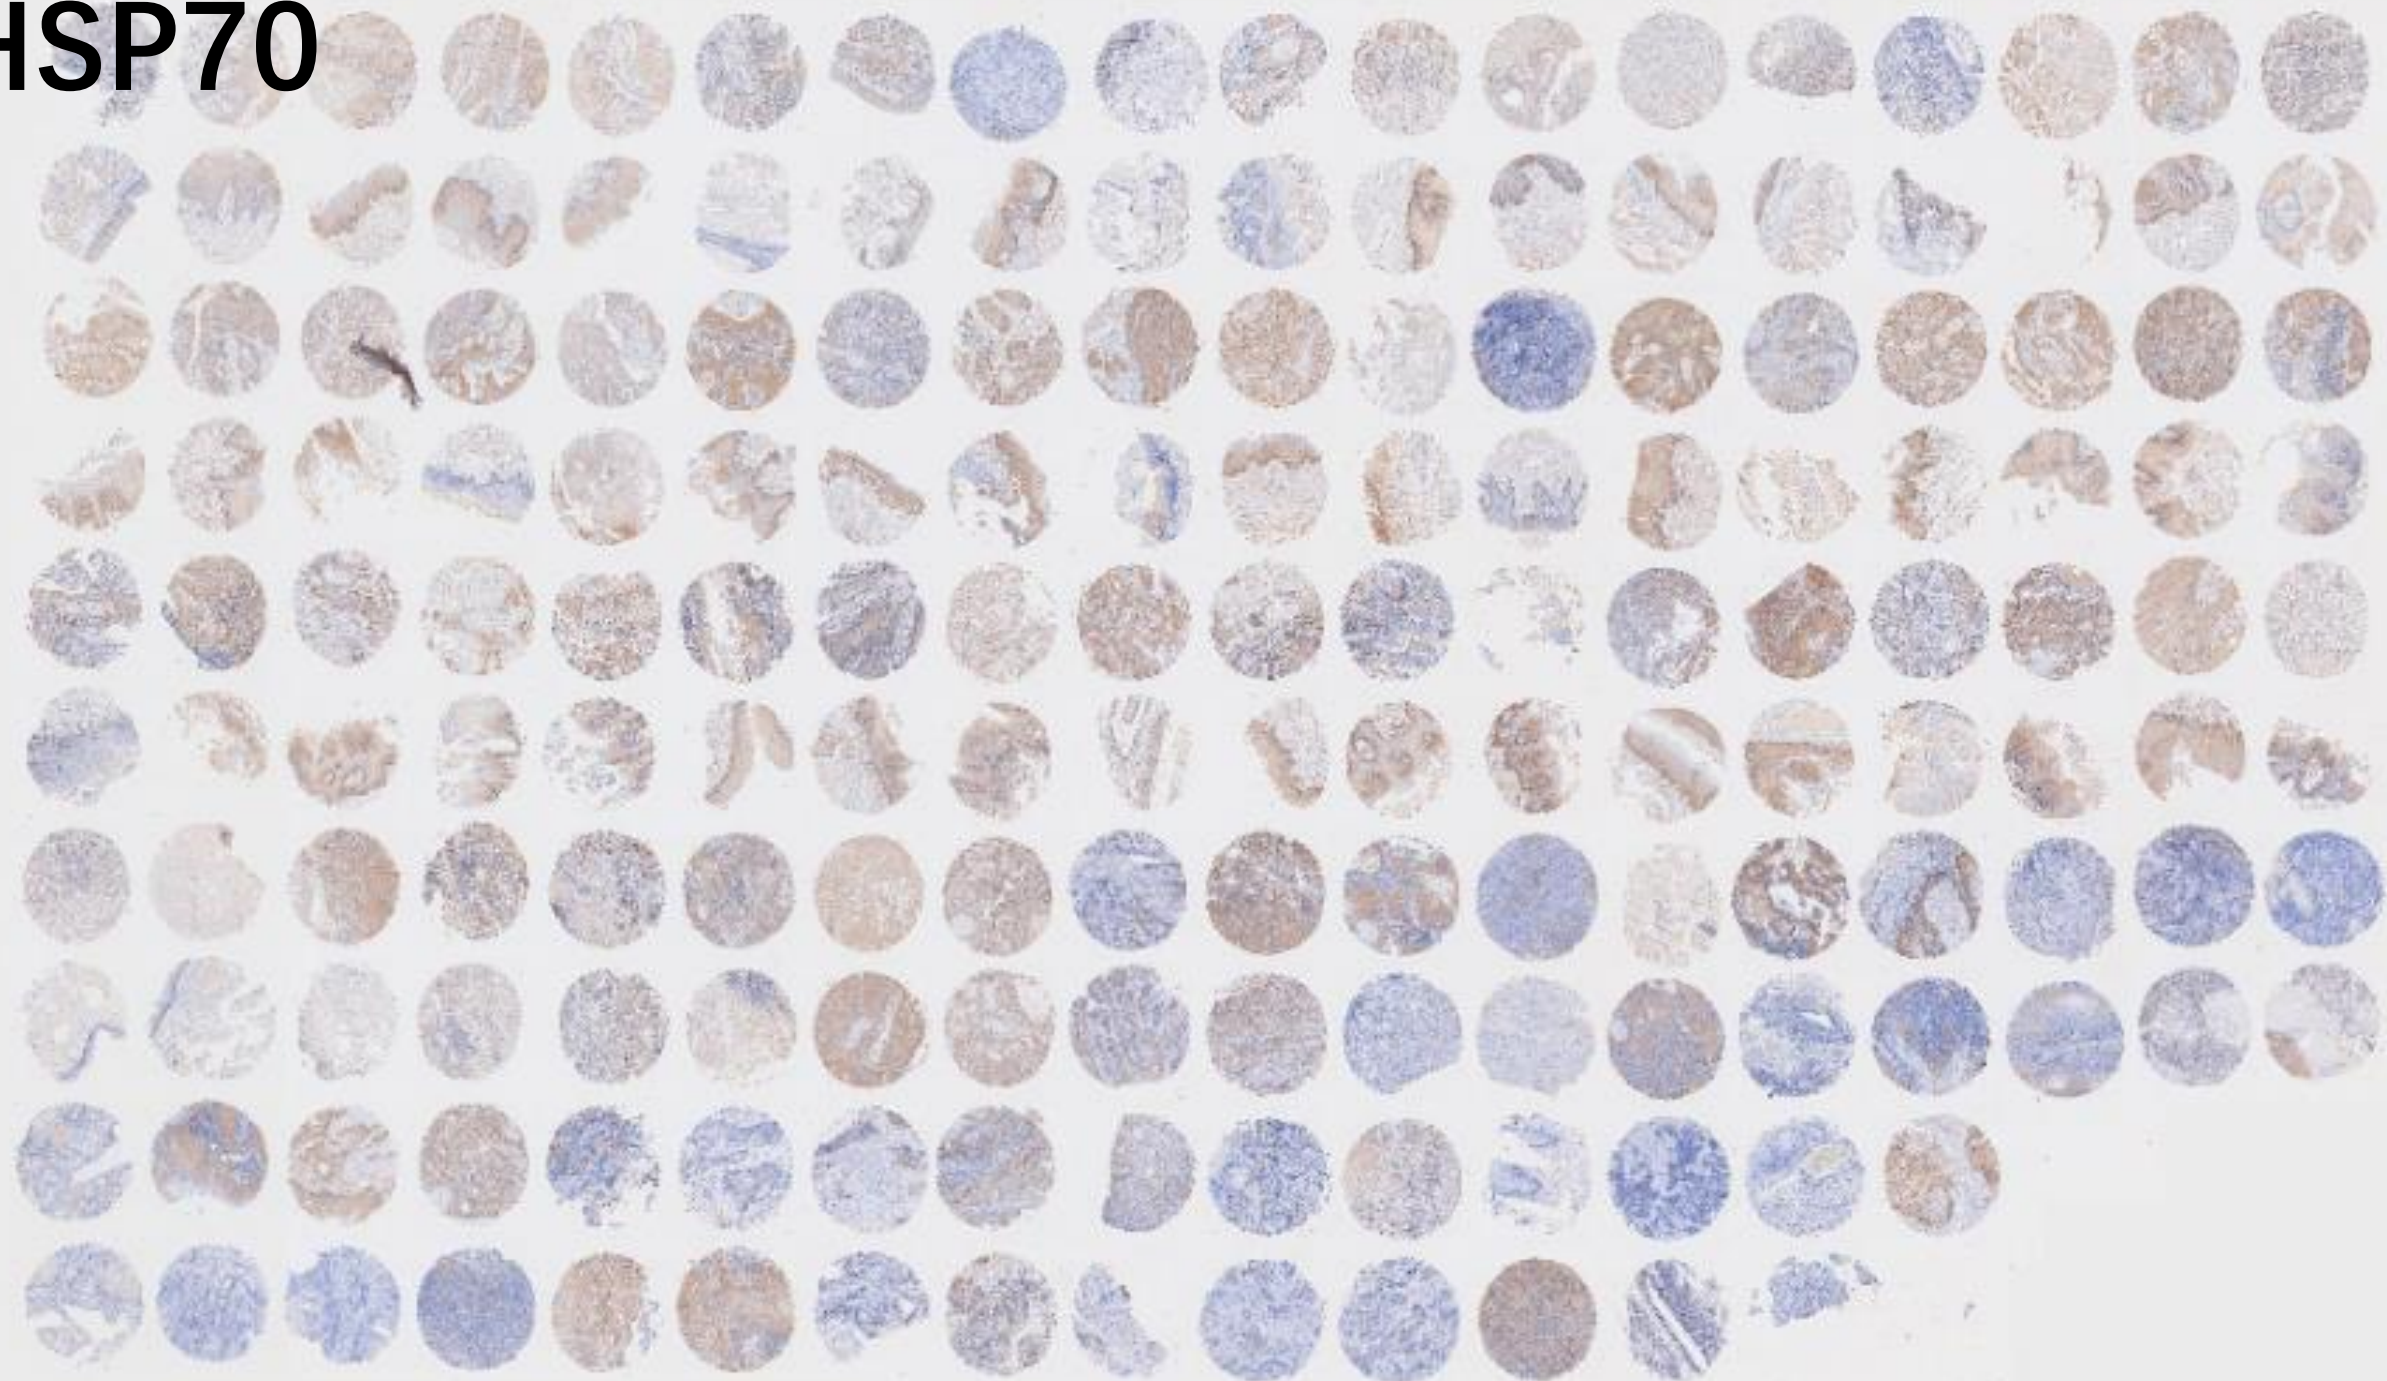

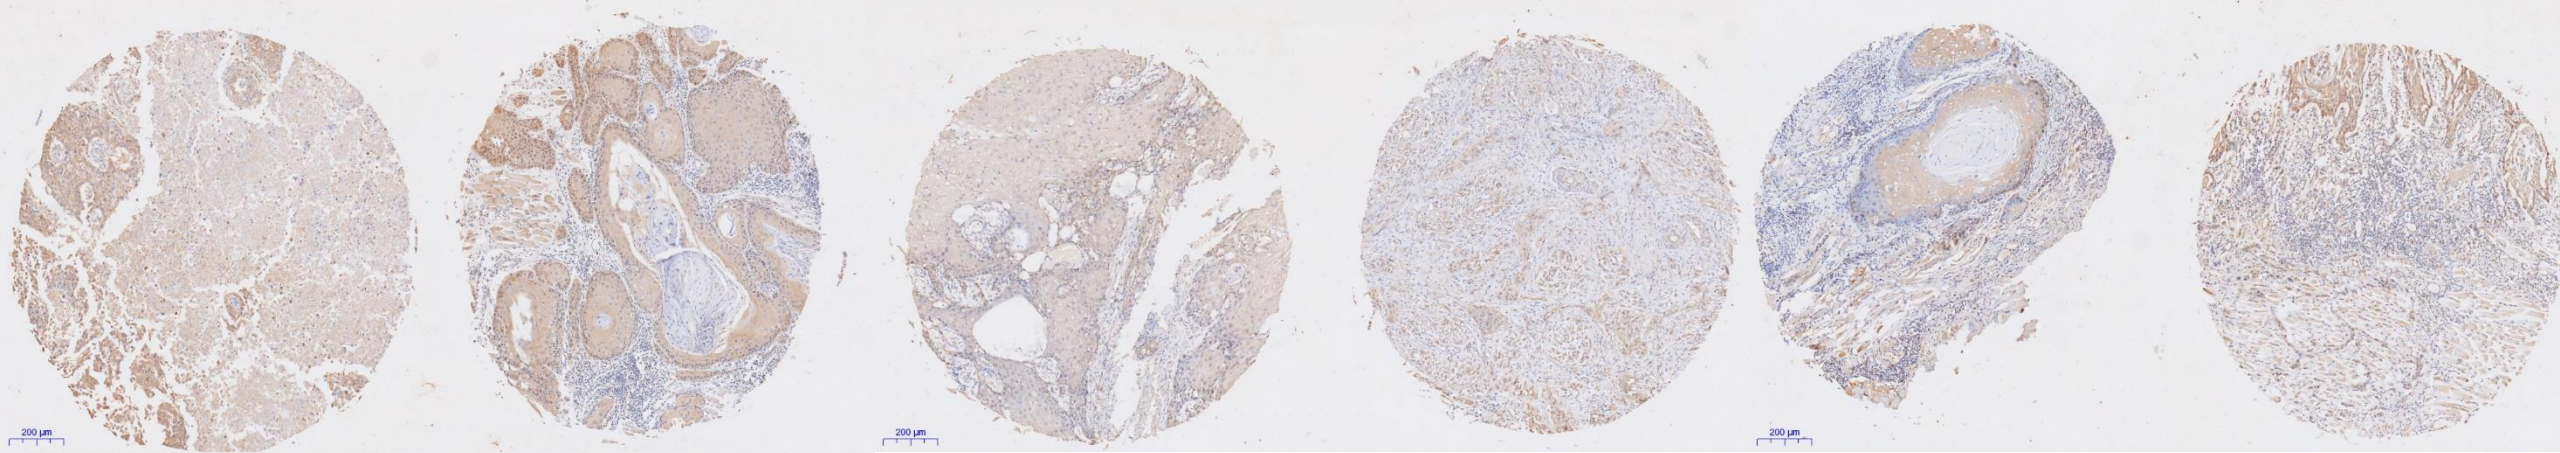

200  $\mu$ m

200  $\mu$ m

200  $\mu$ m

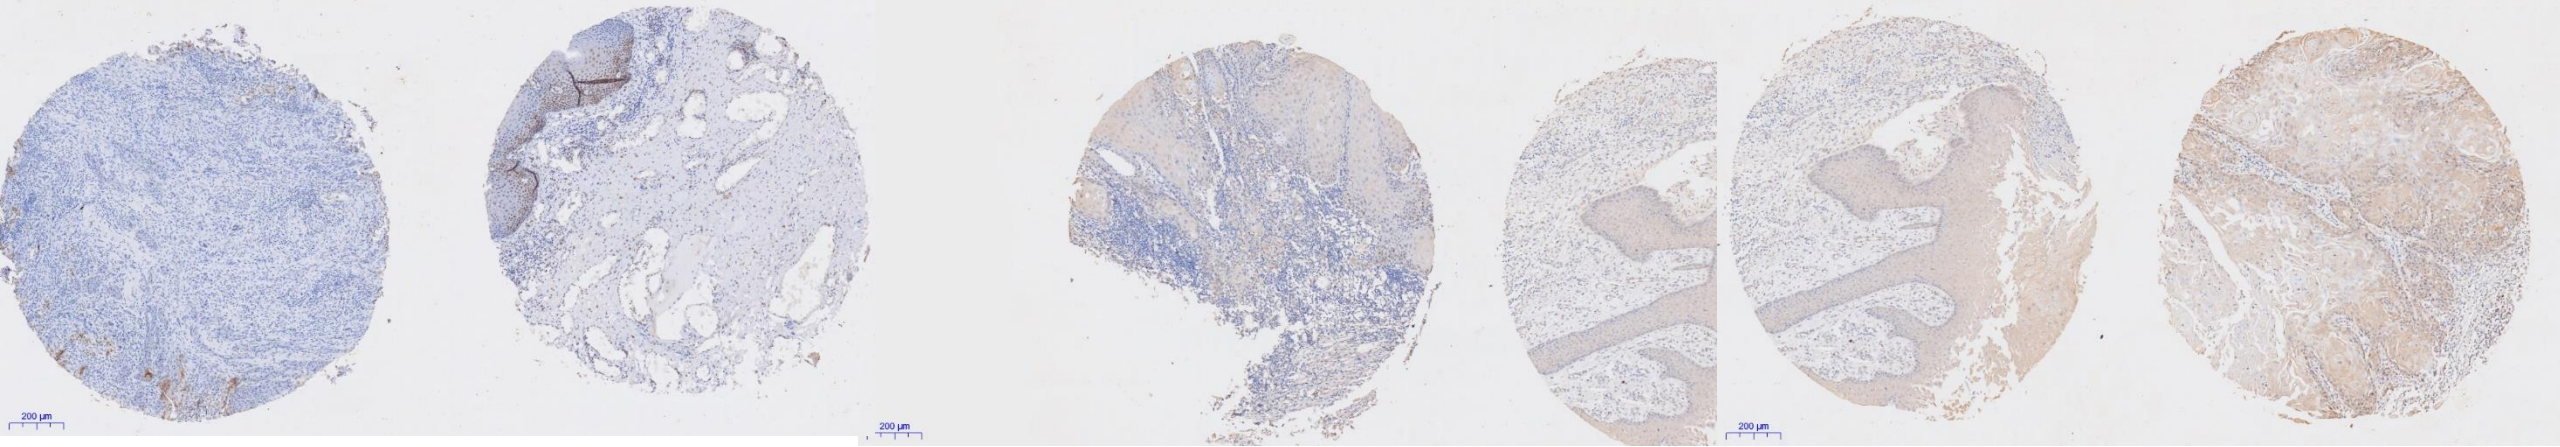

200  $\mu$ m

200  $\mu$ m

200  $\mu$ m

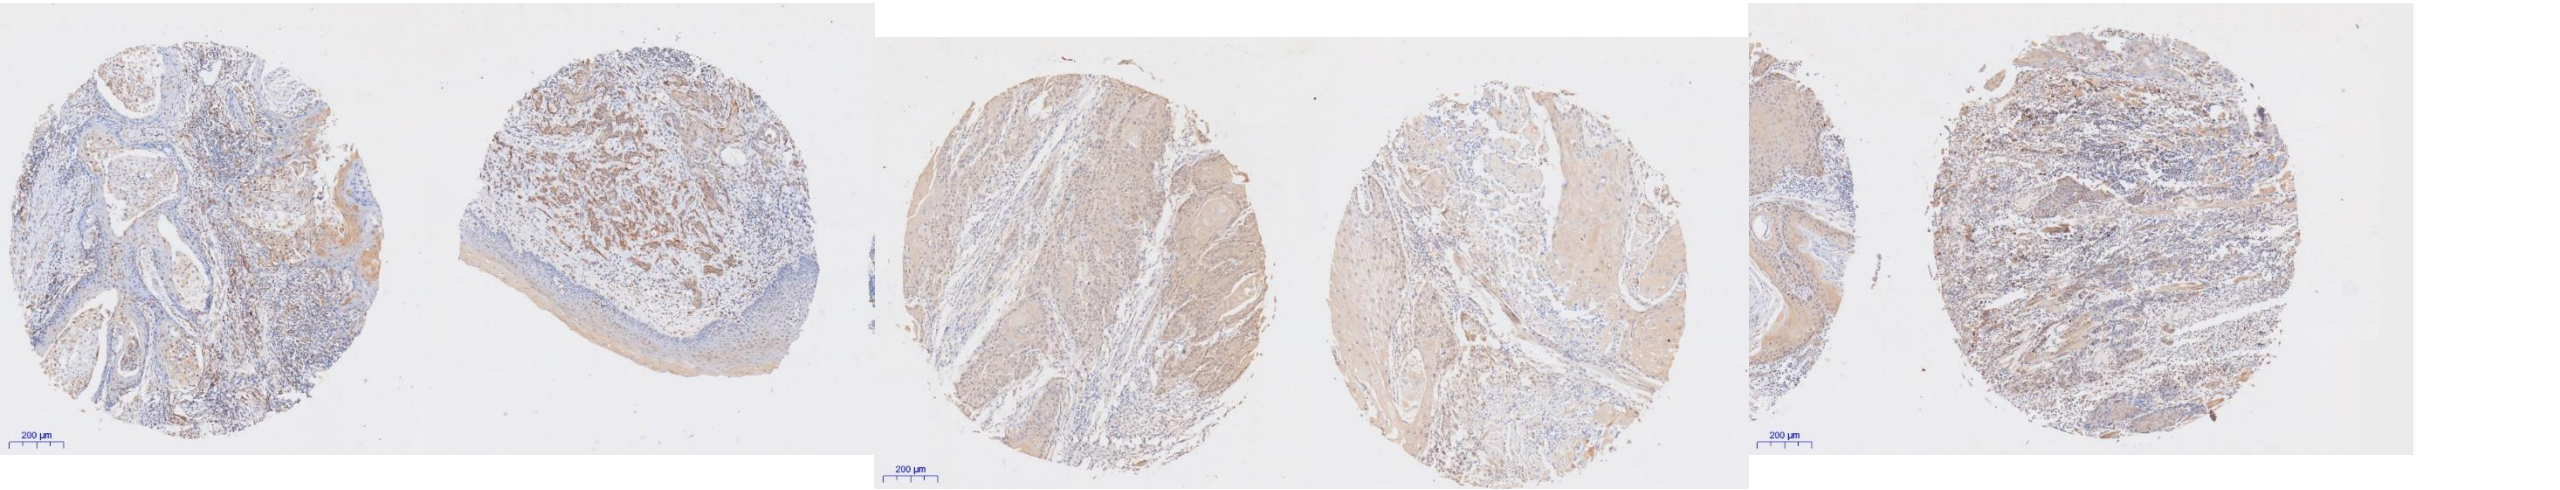

200  $\mu$ m

200  $\mu$ m

200  $\mu$ m

HIF1 $\alpha$

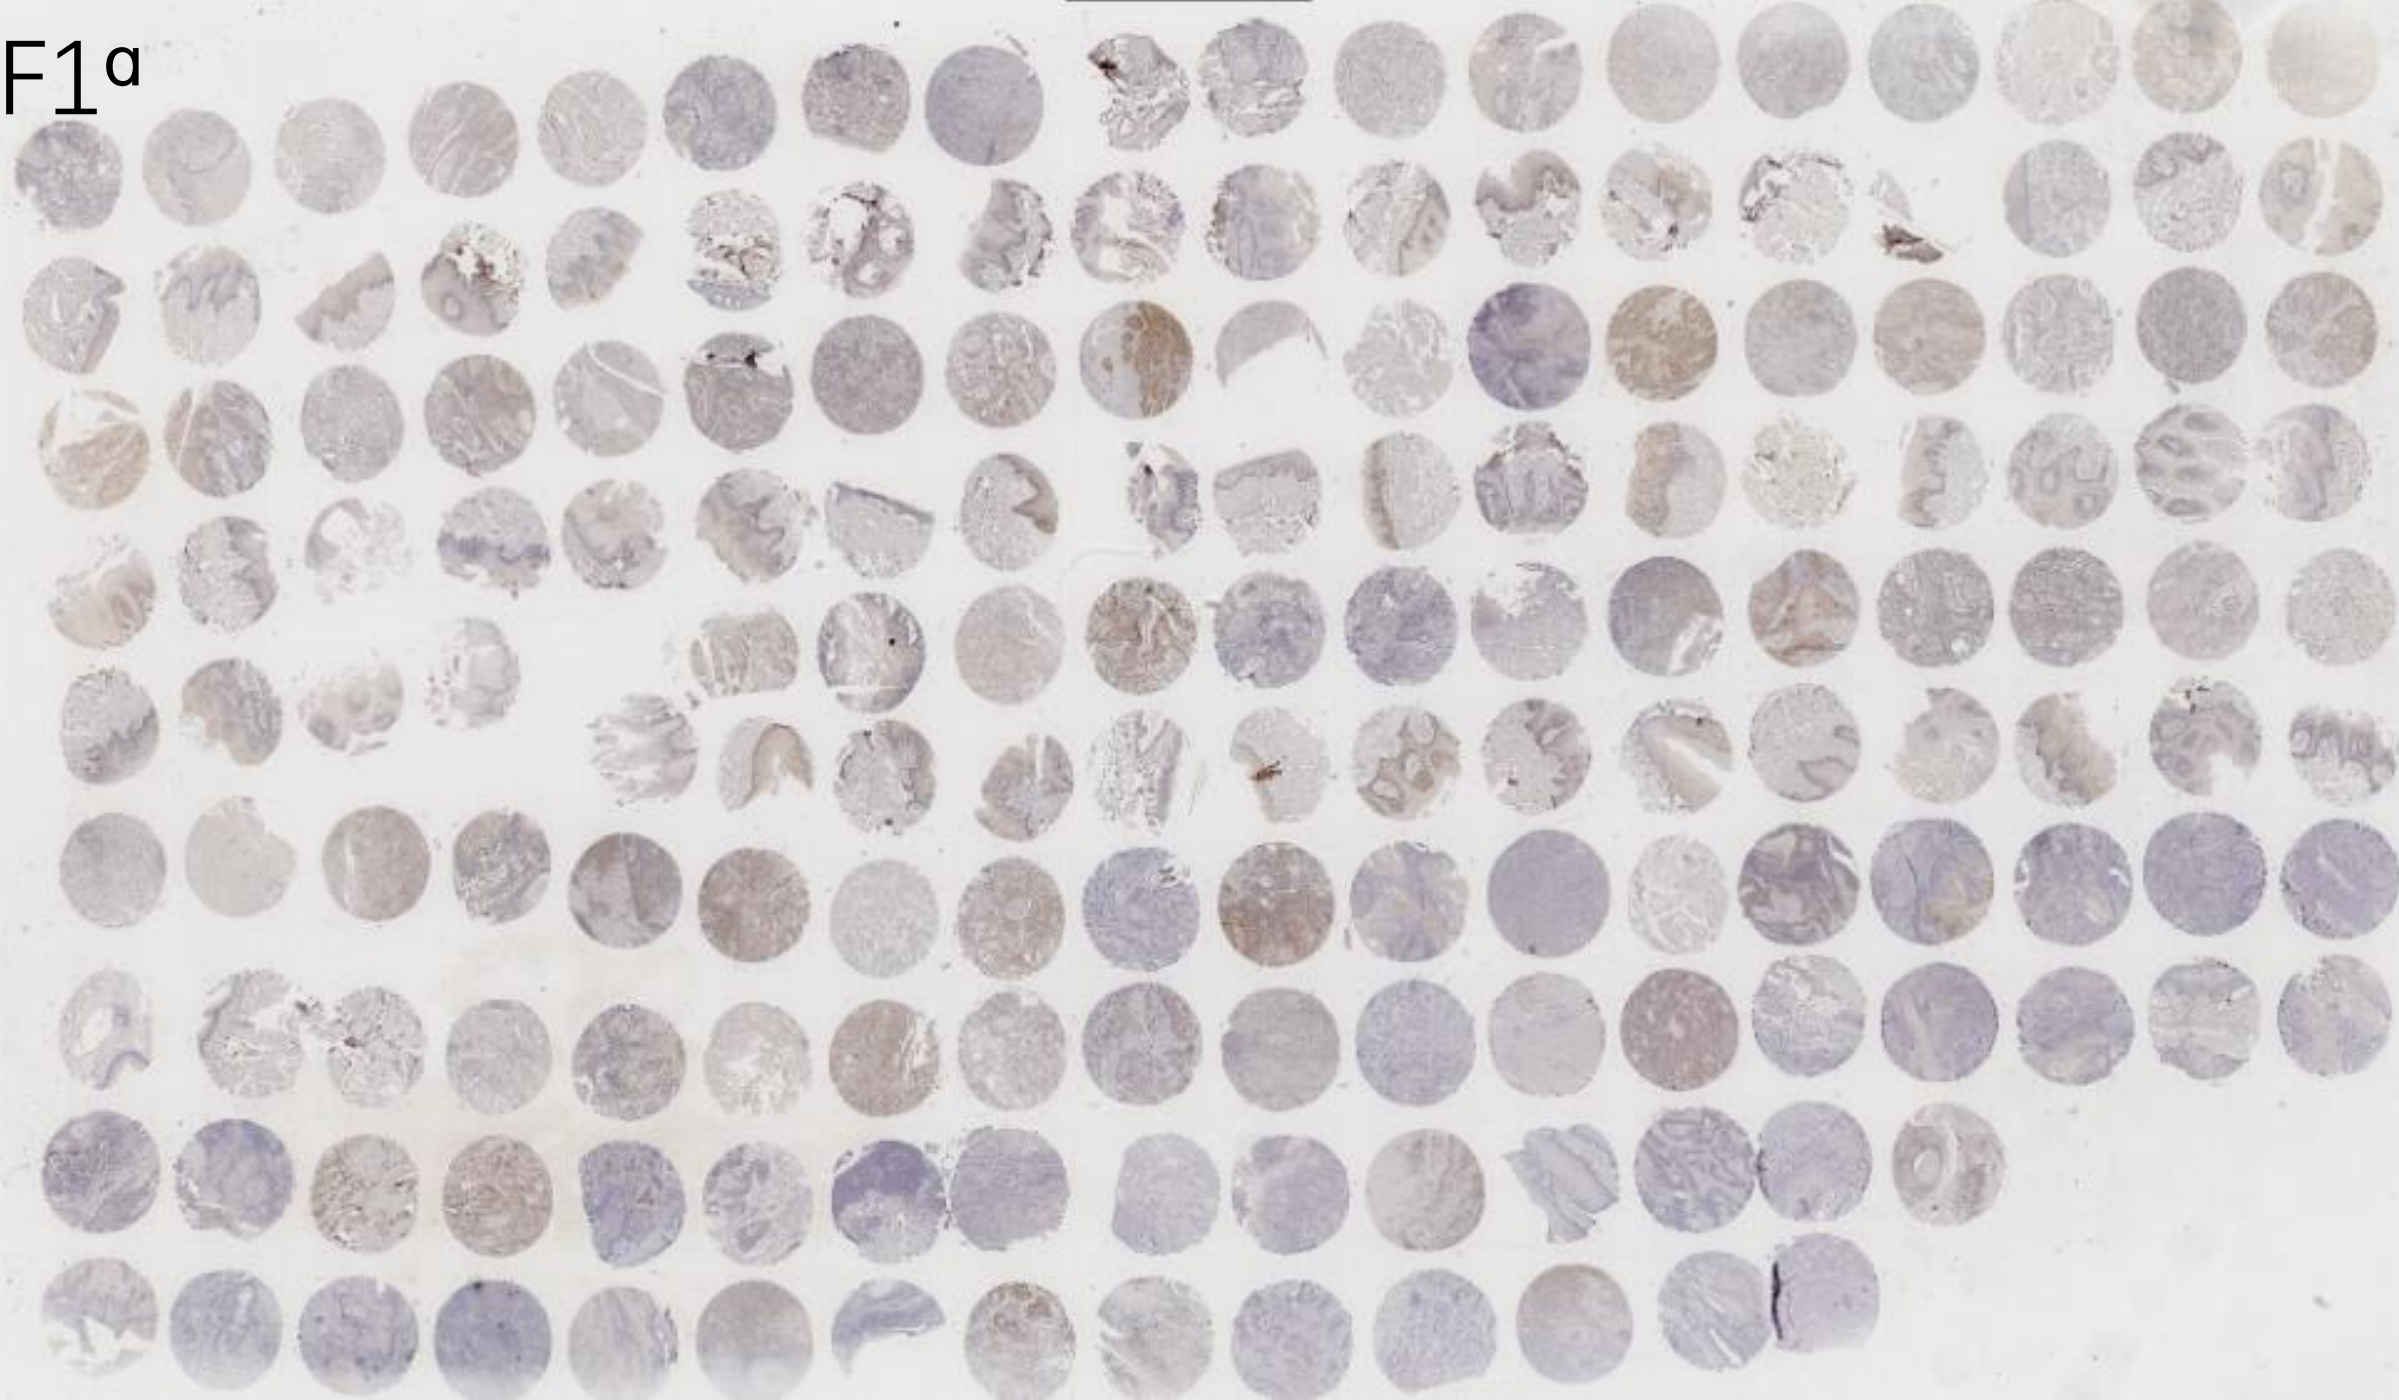

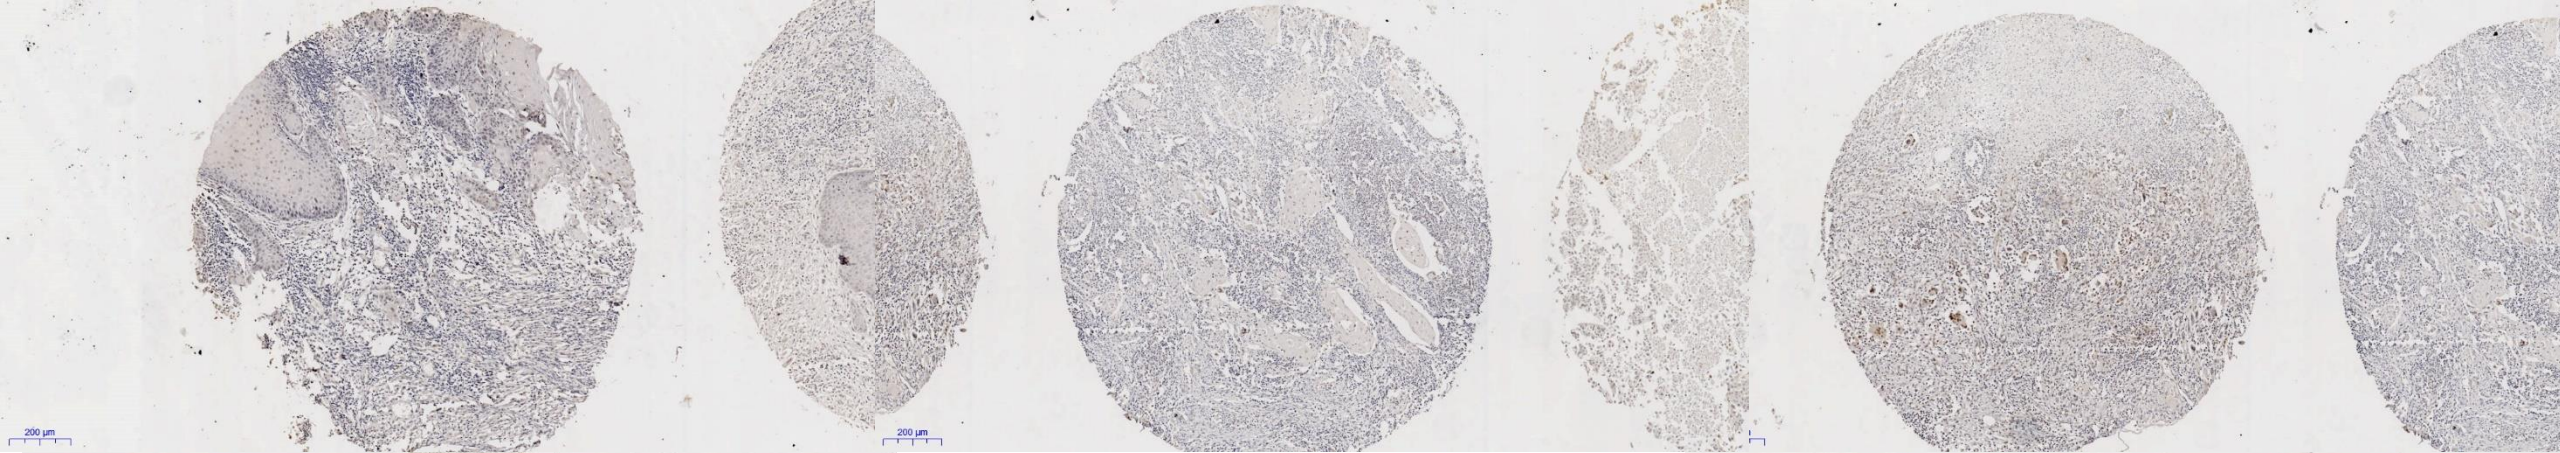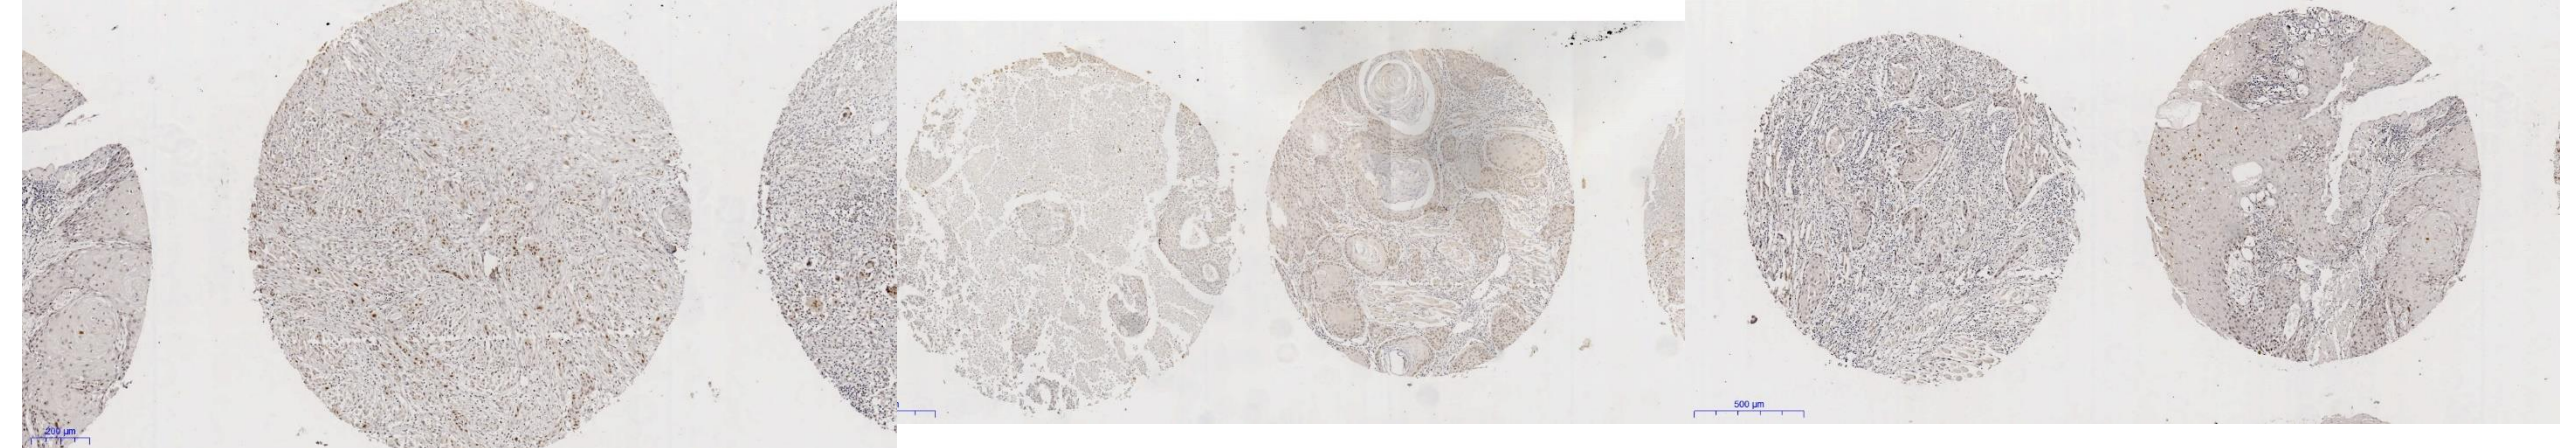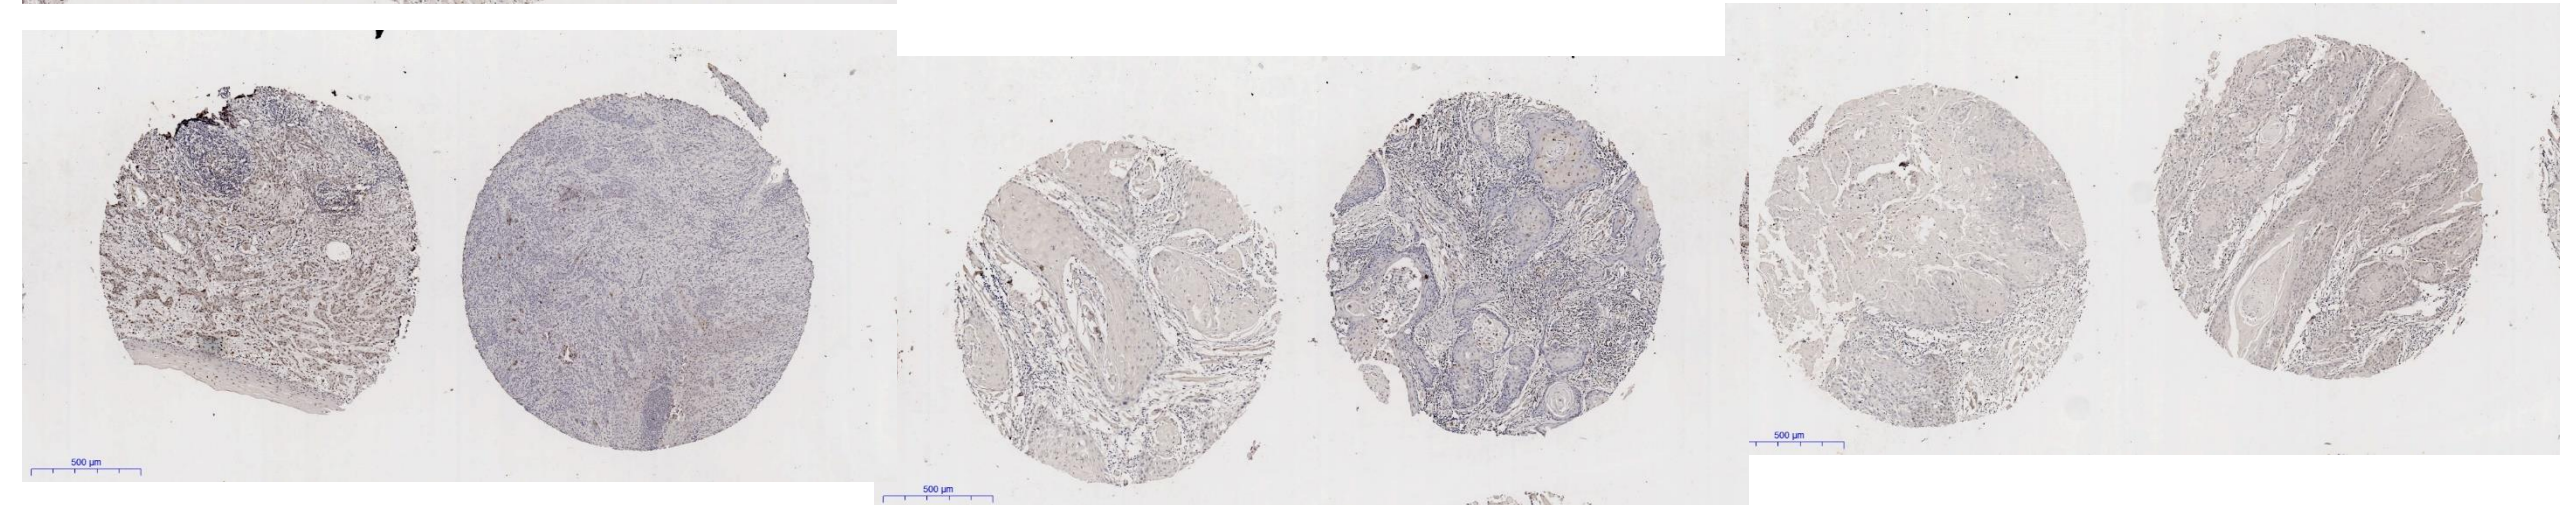

# CORTACTIN

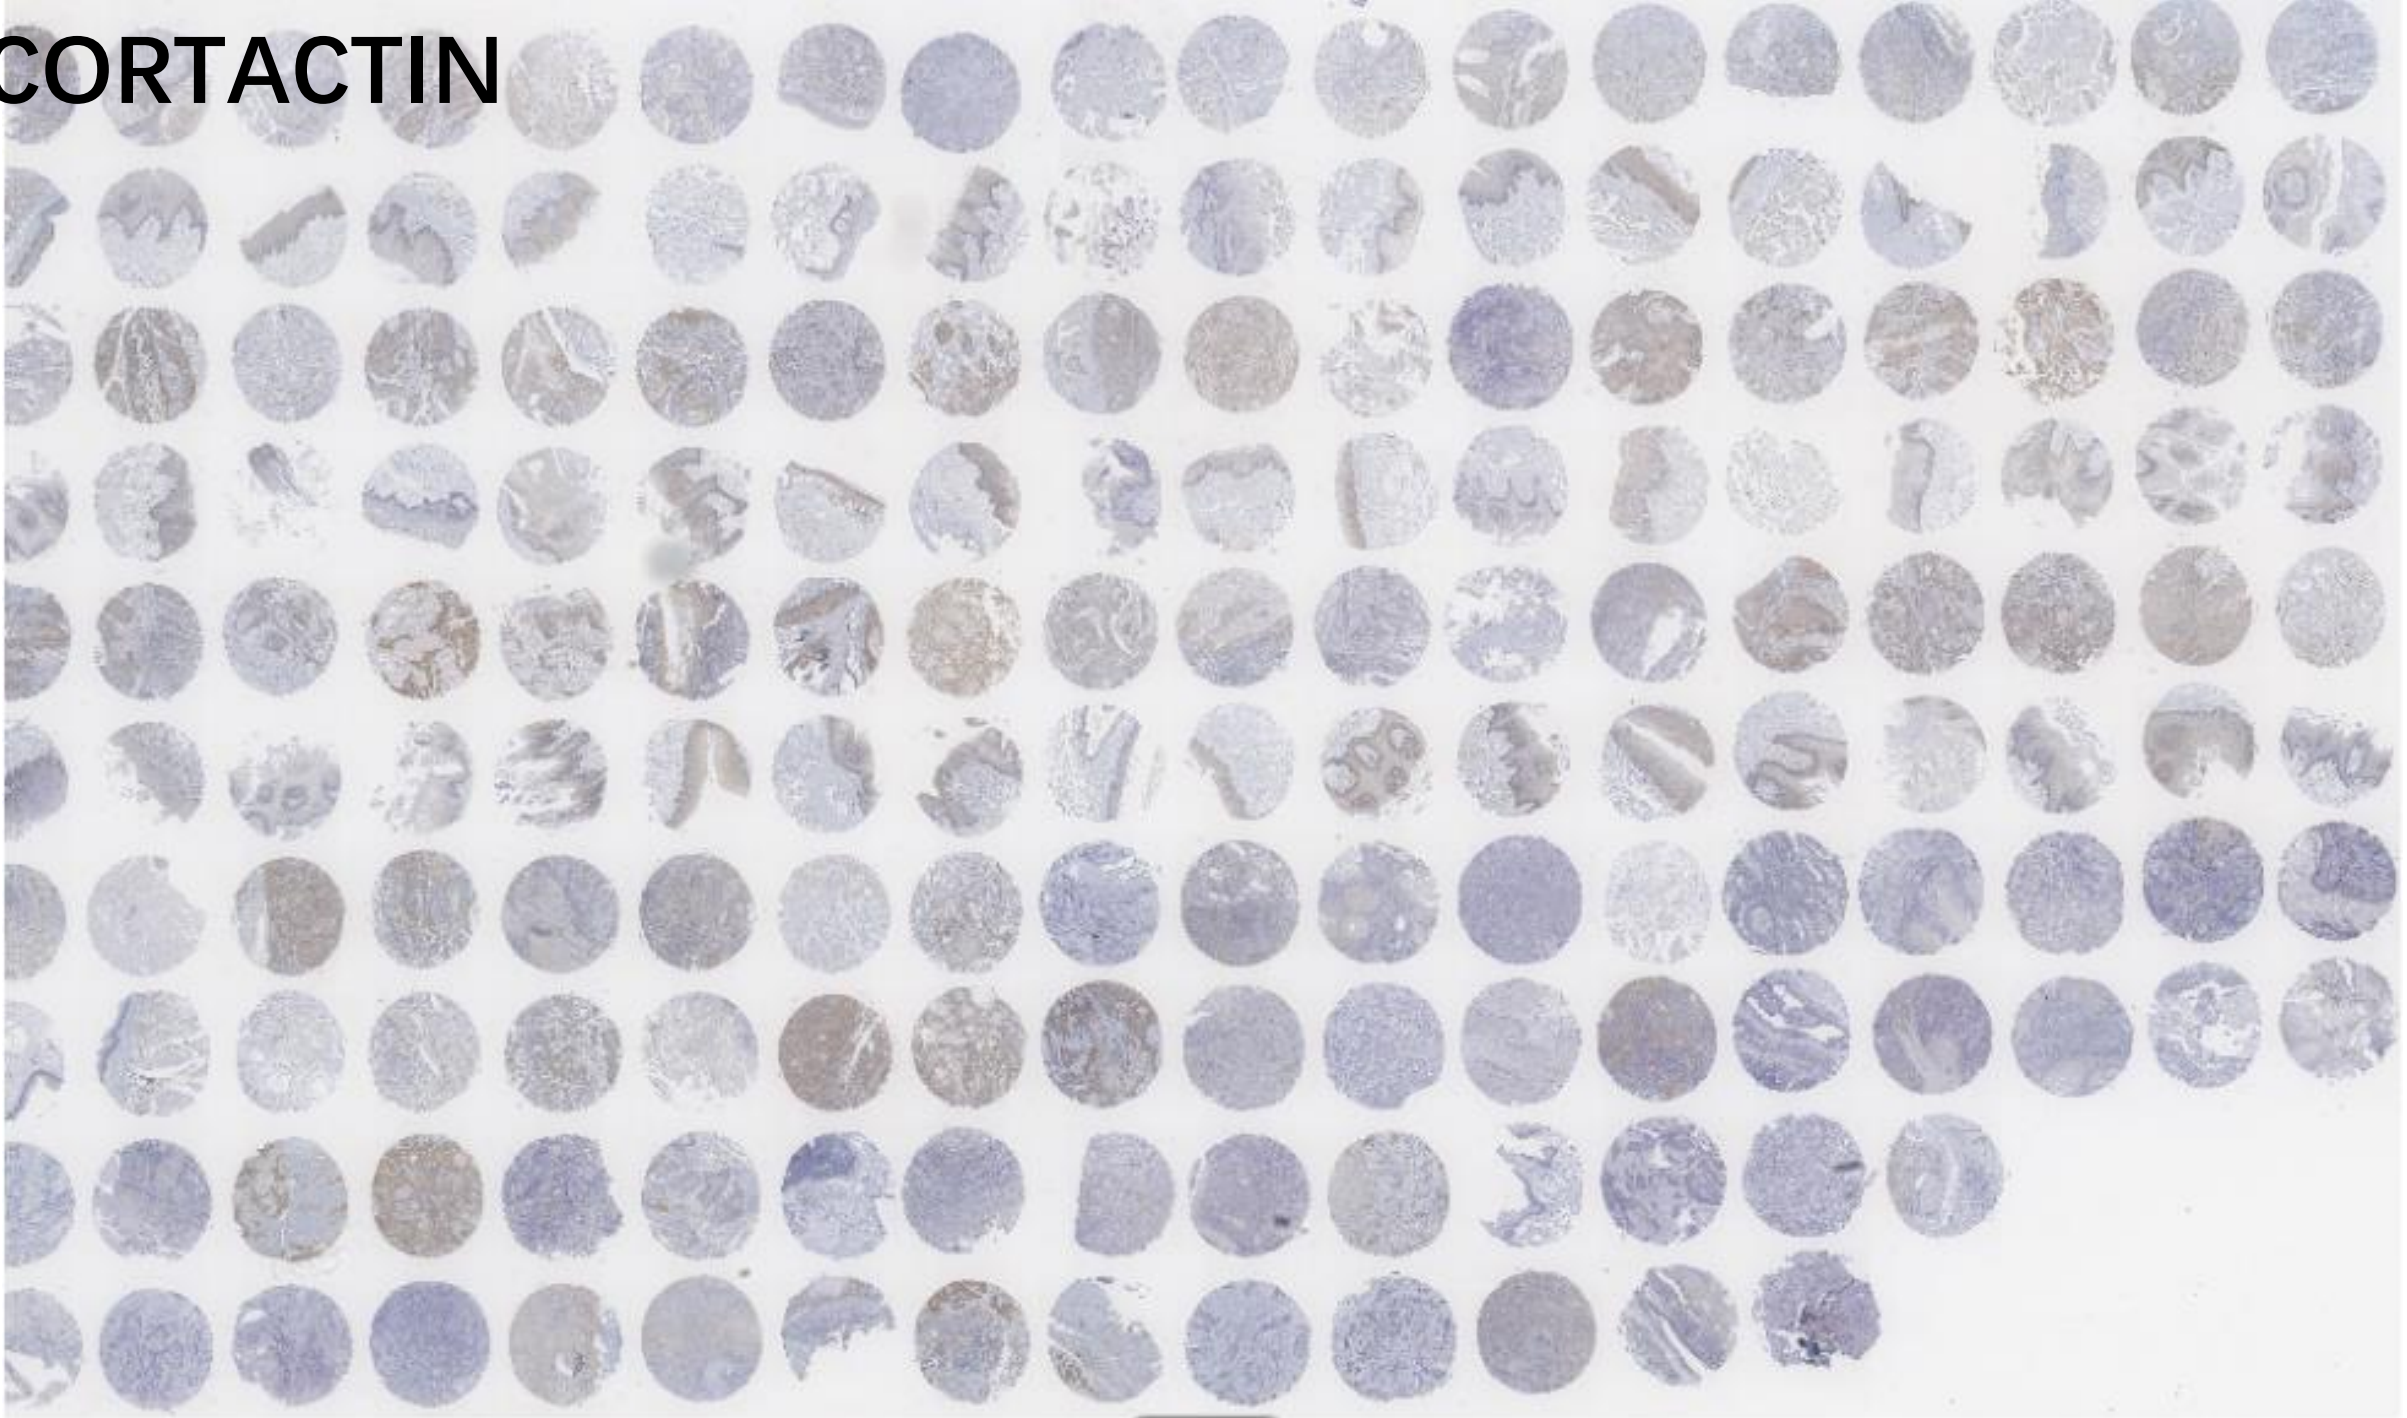

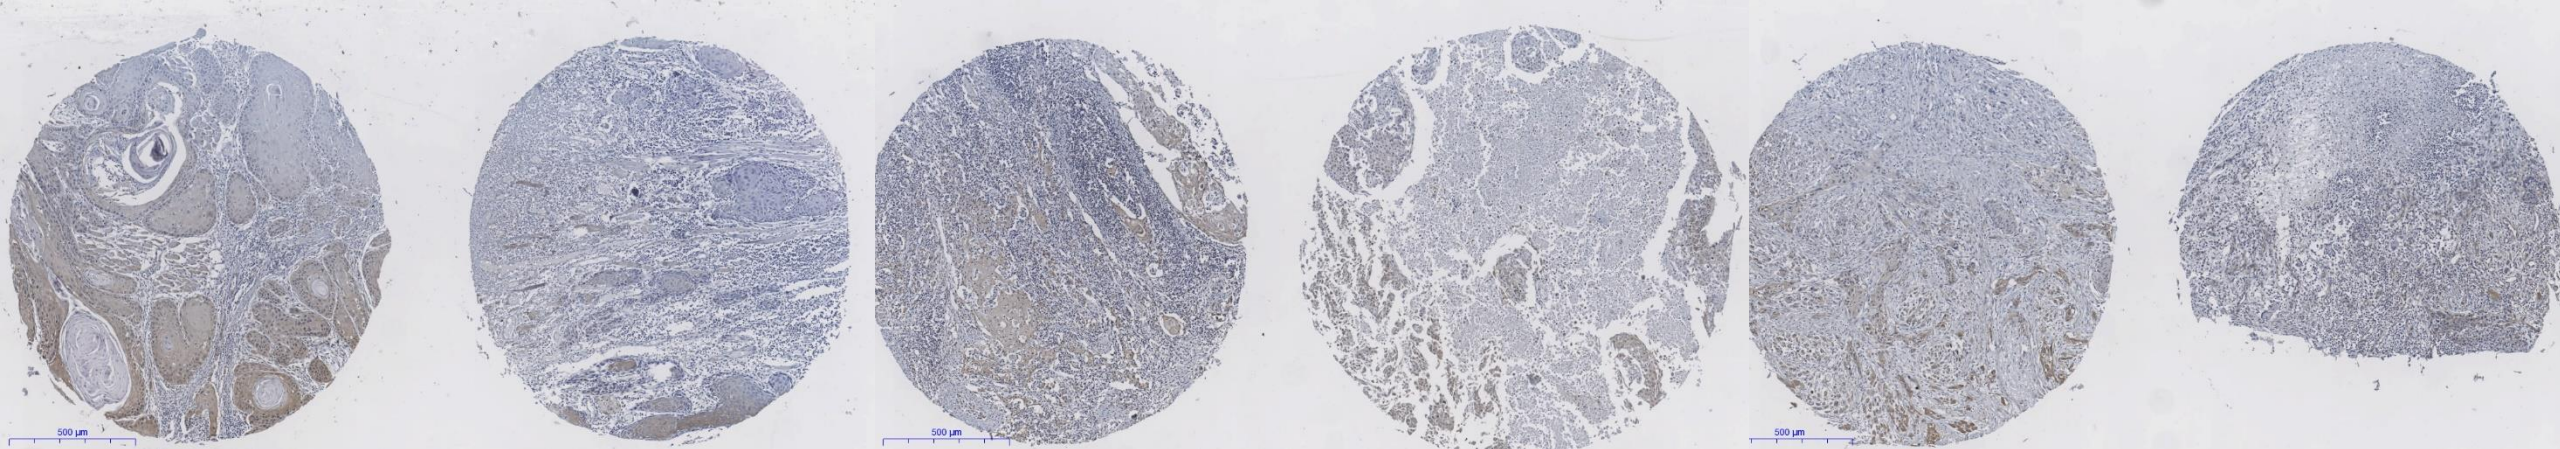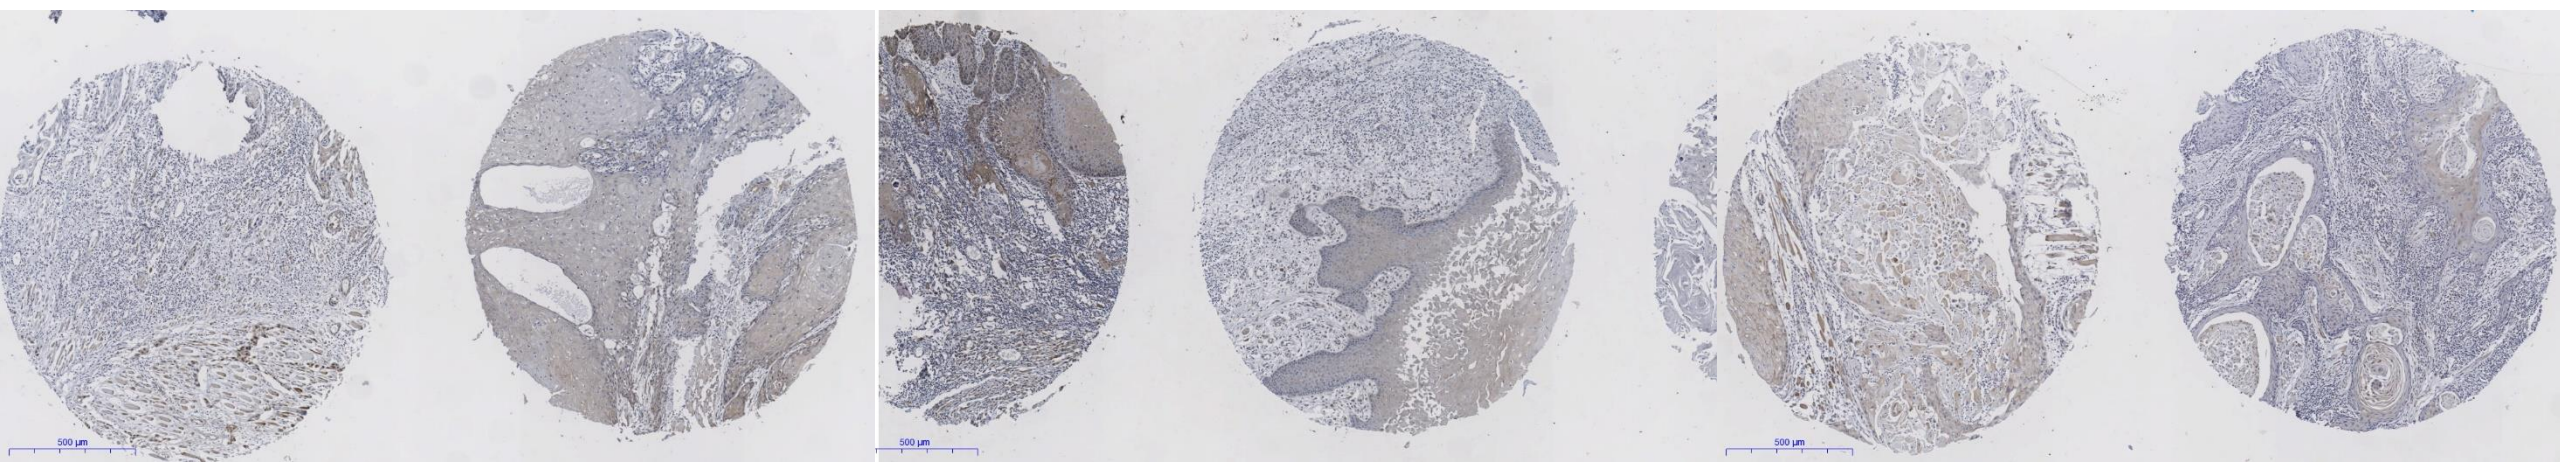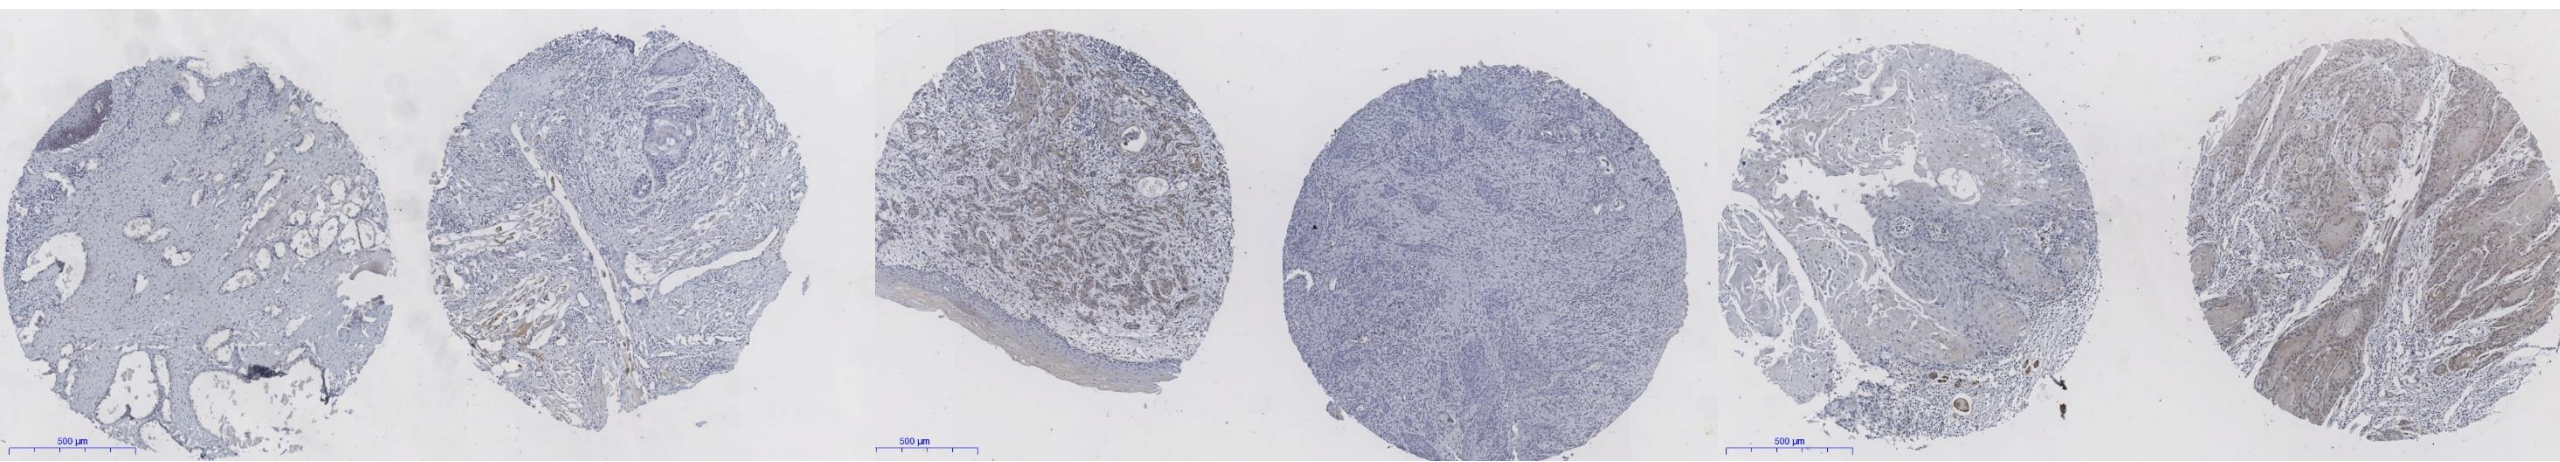

# MMP14

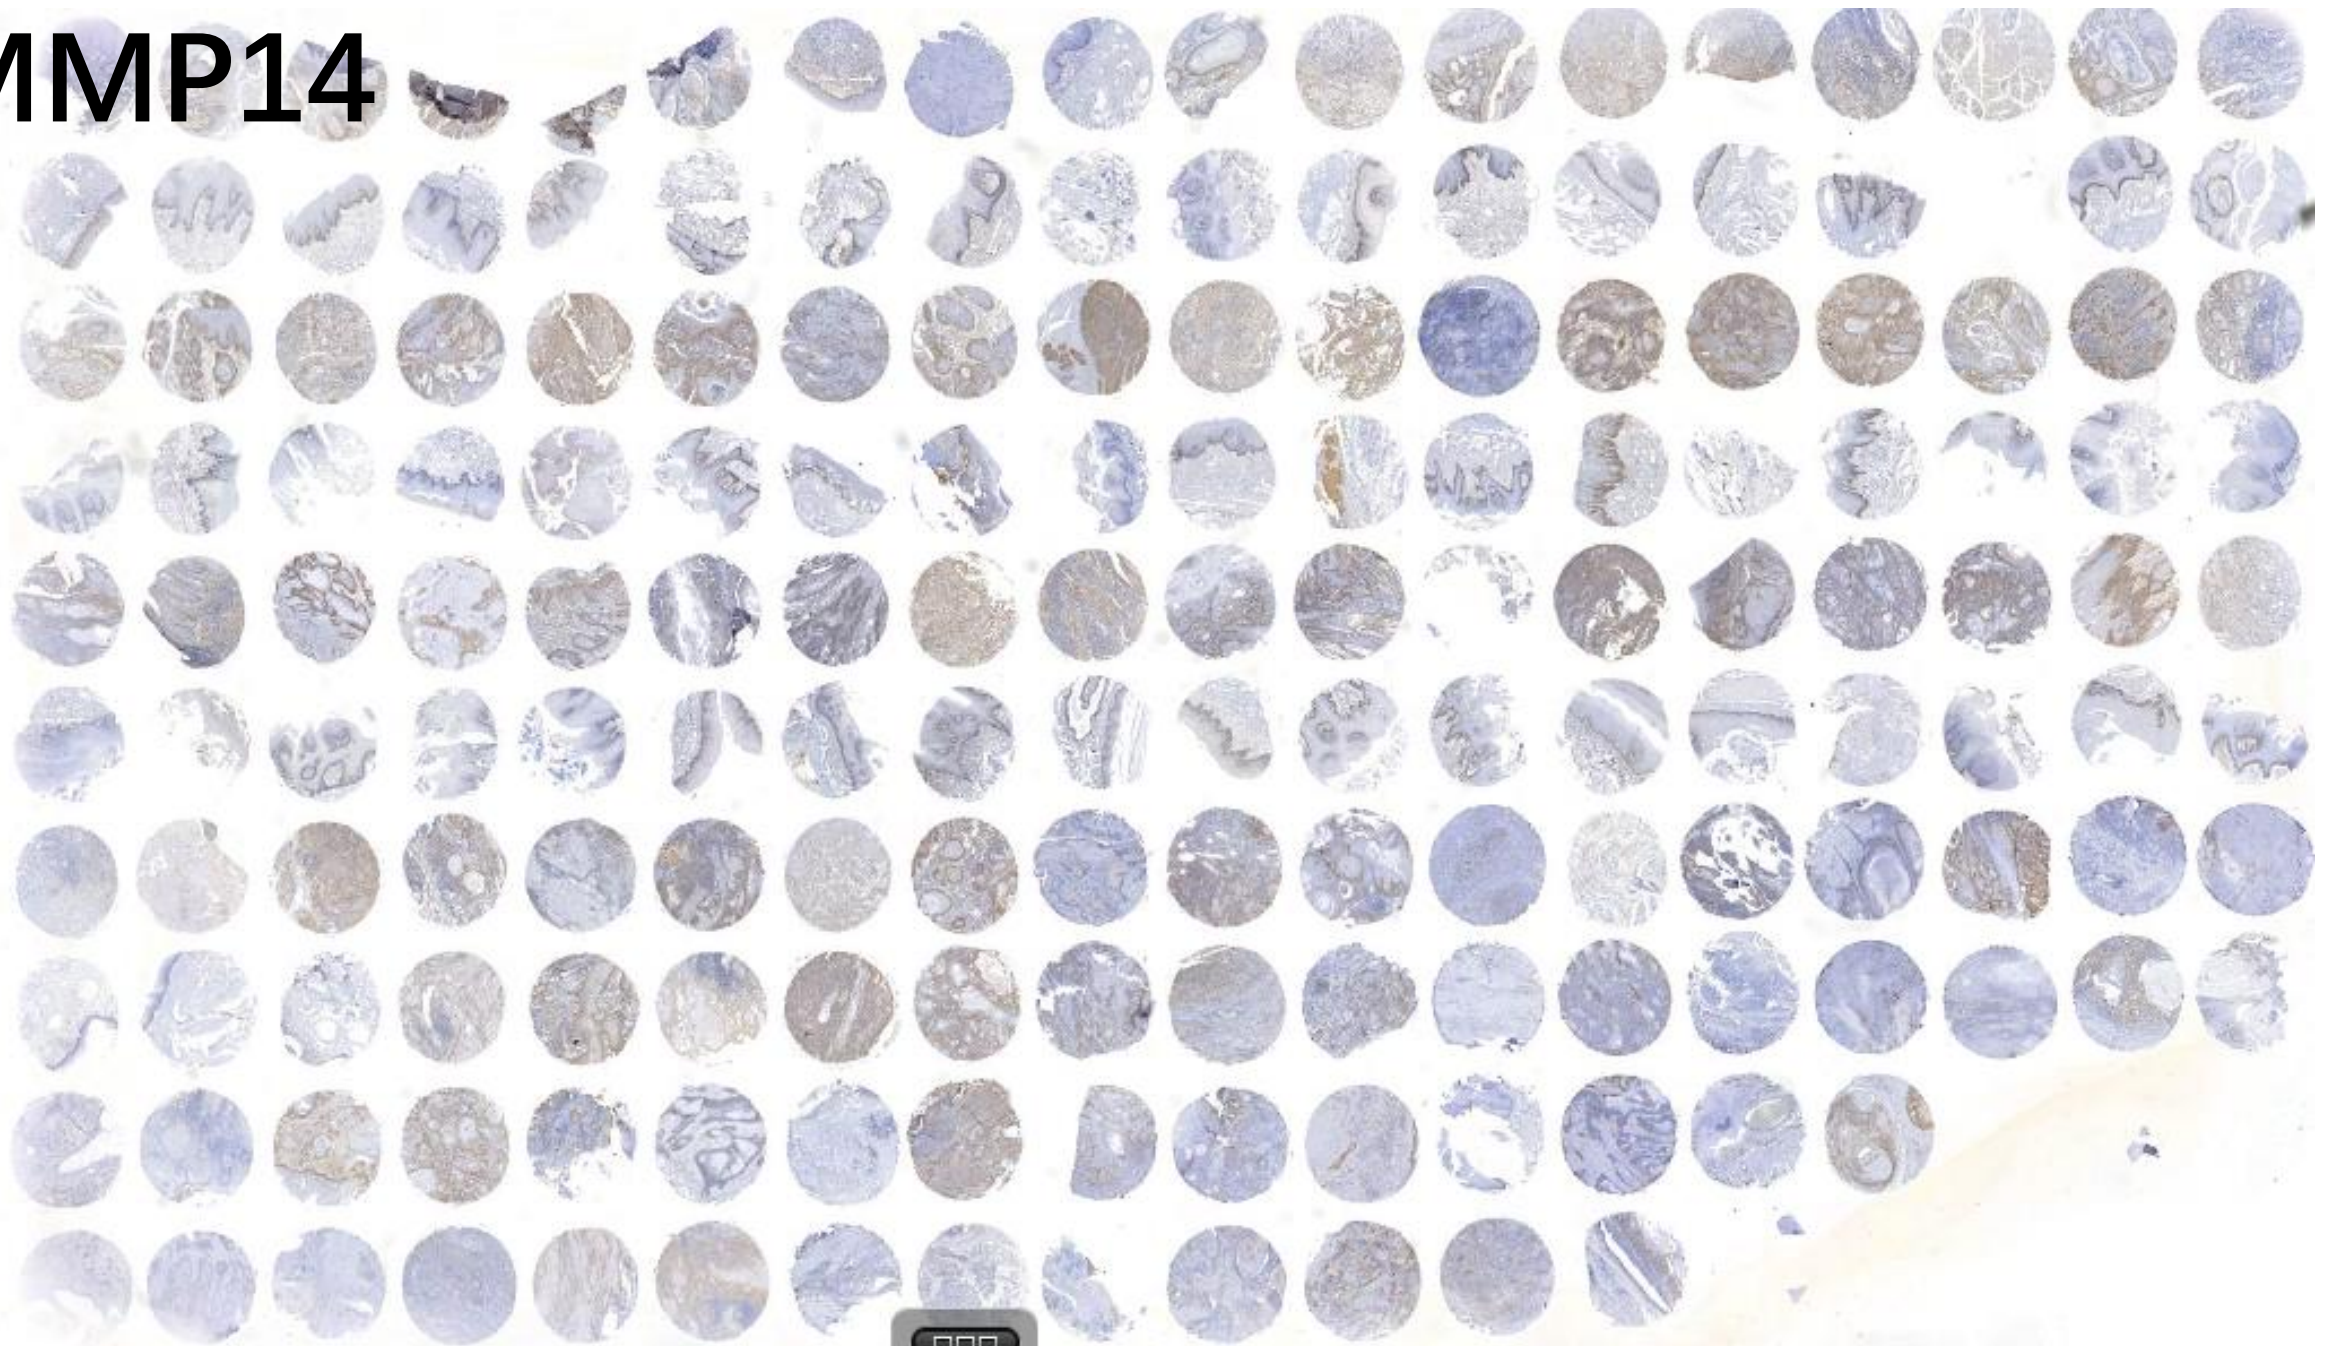

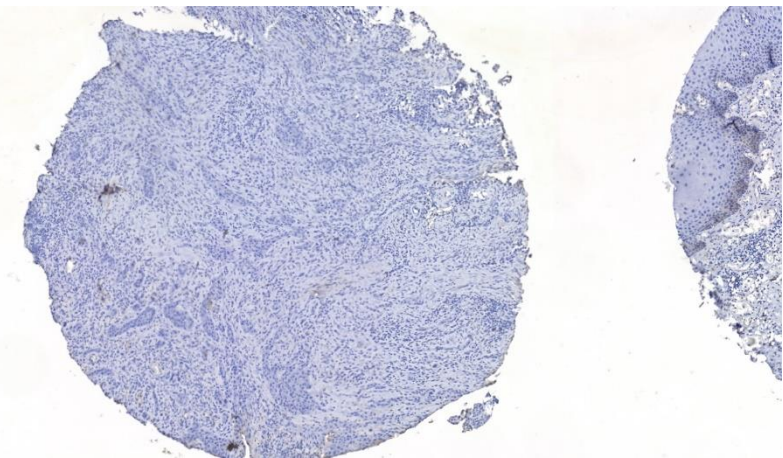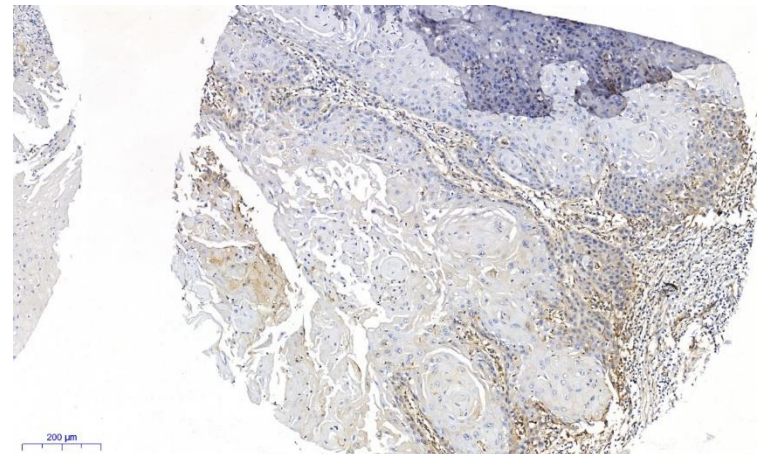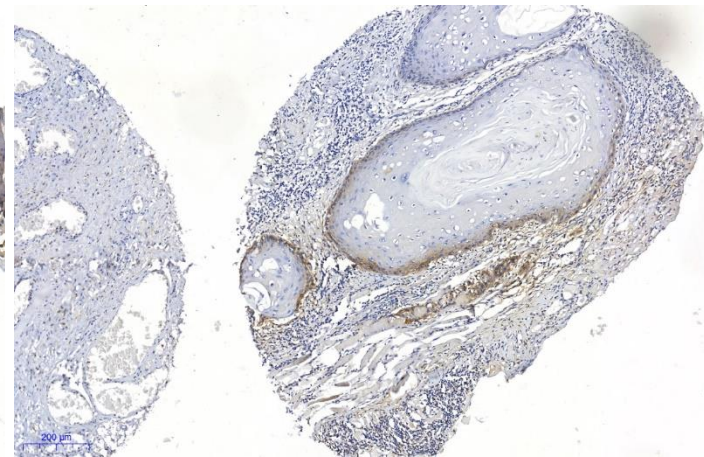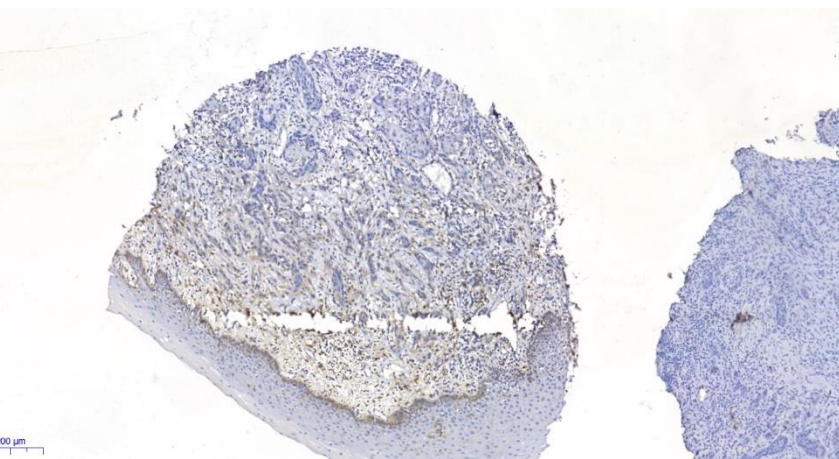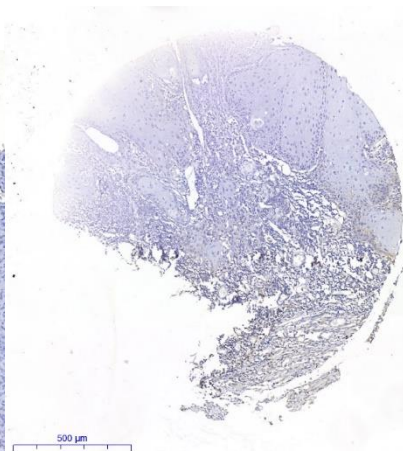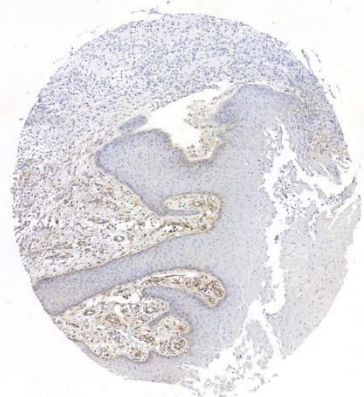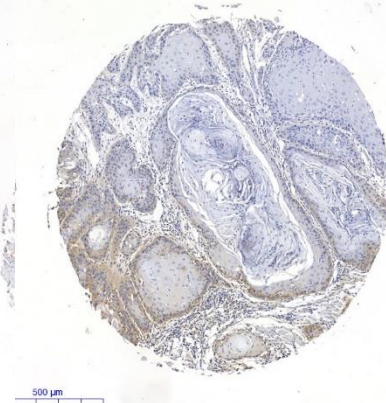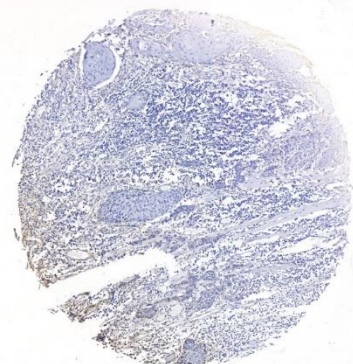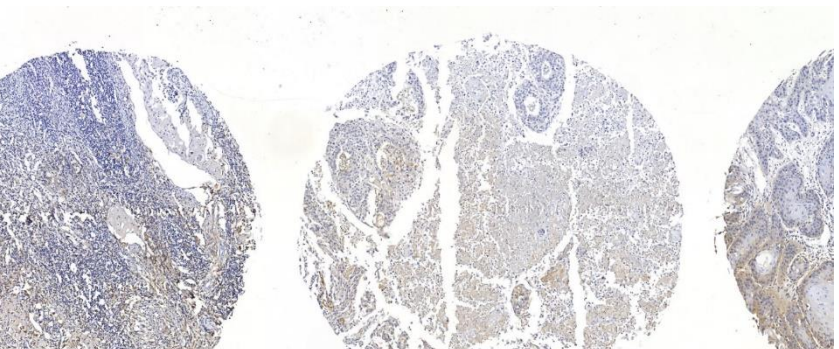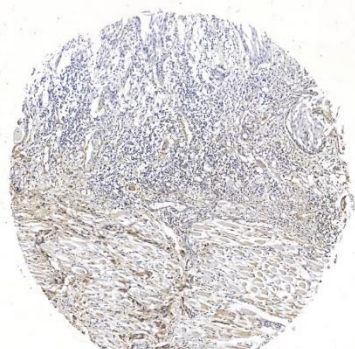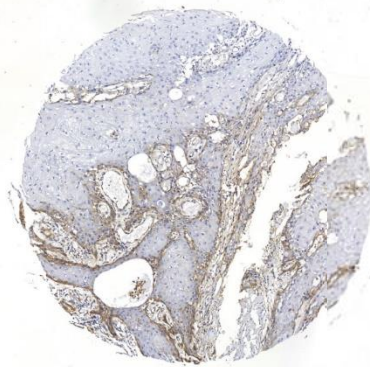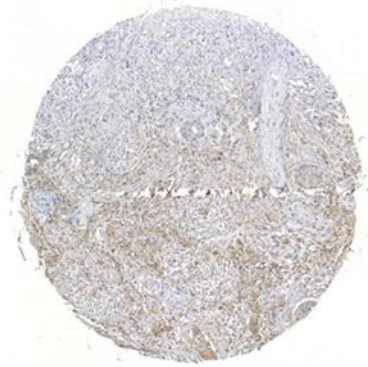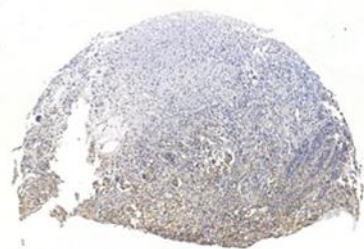



MMP2

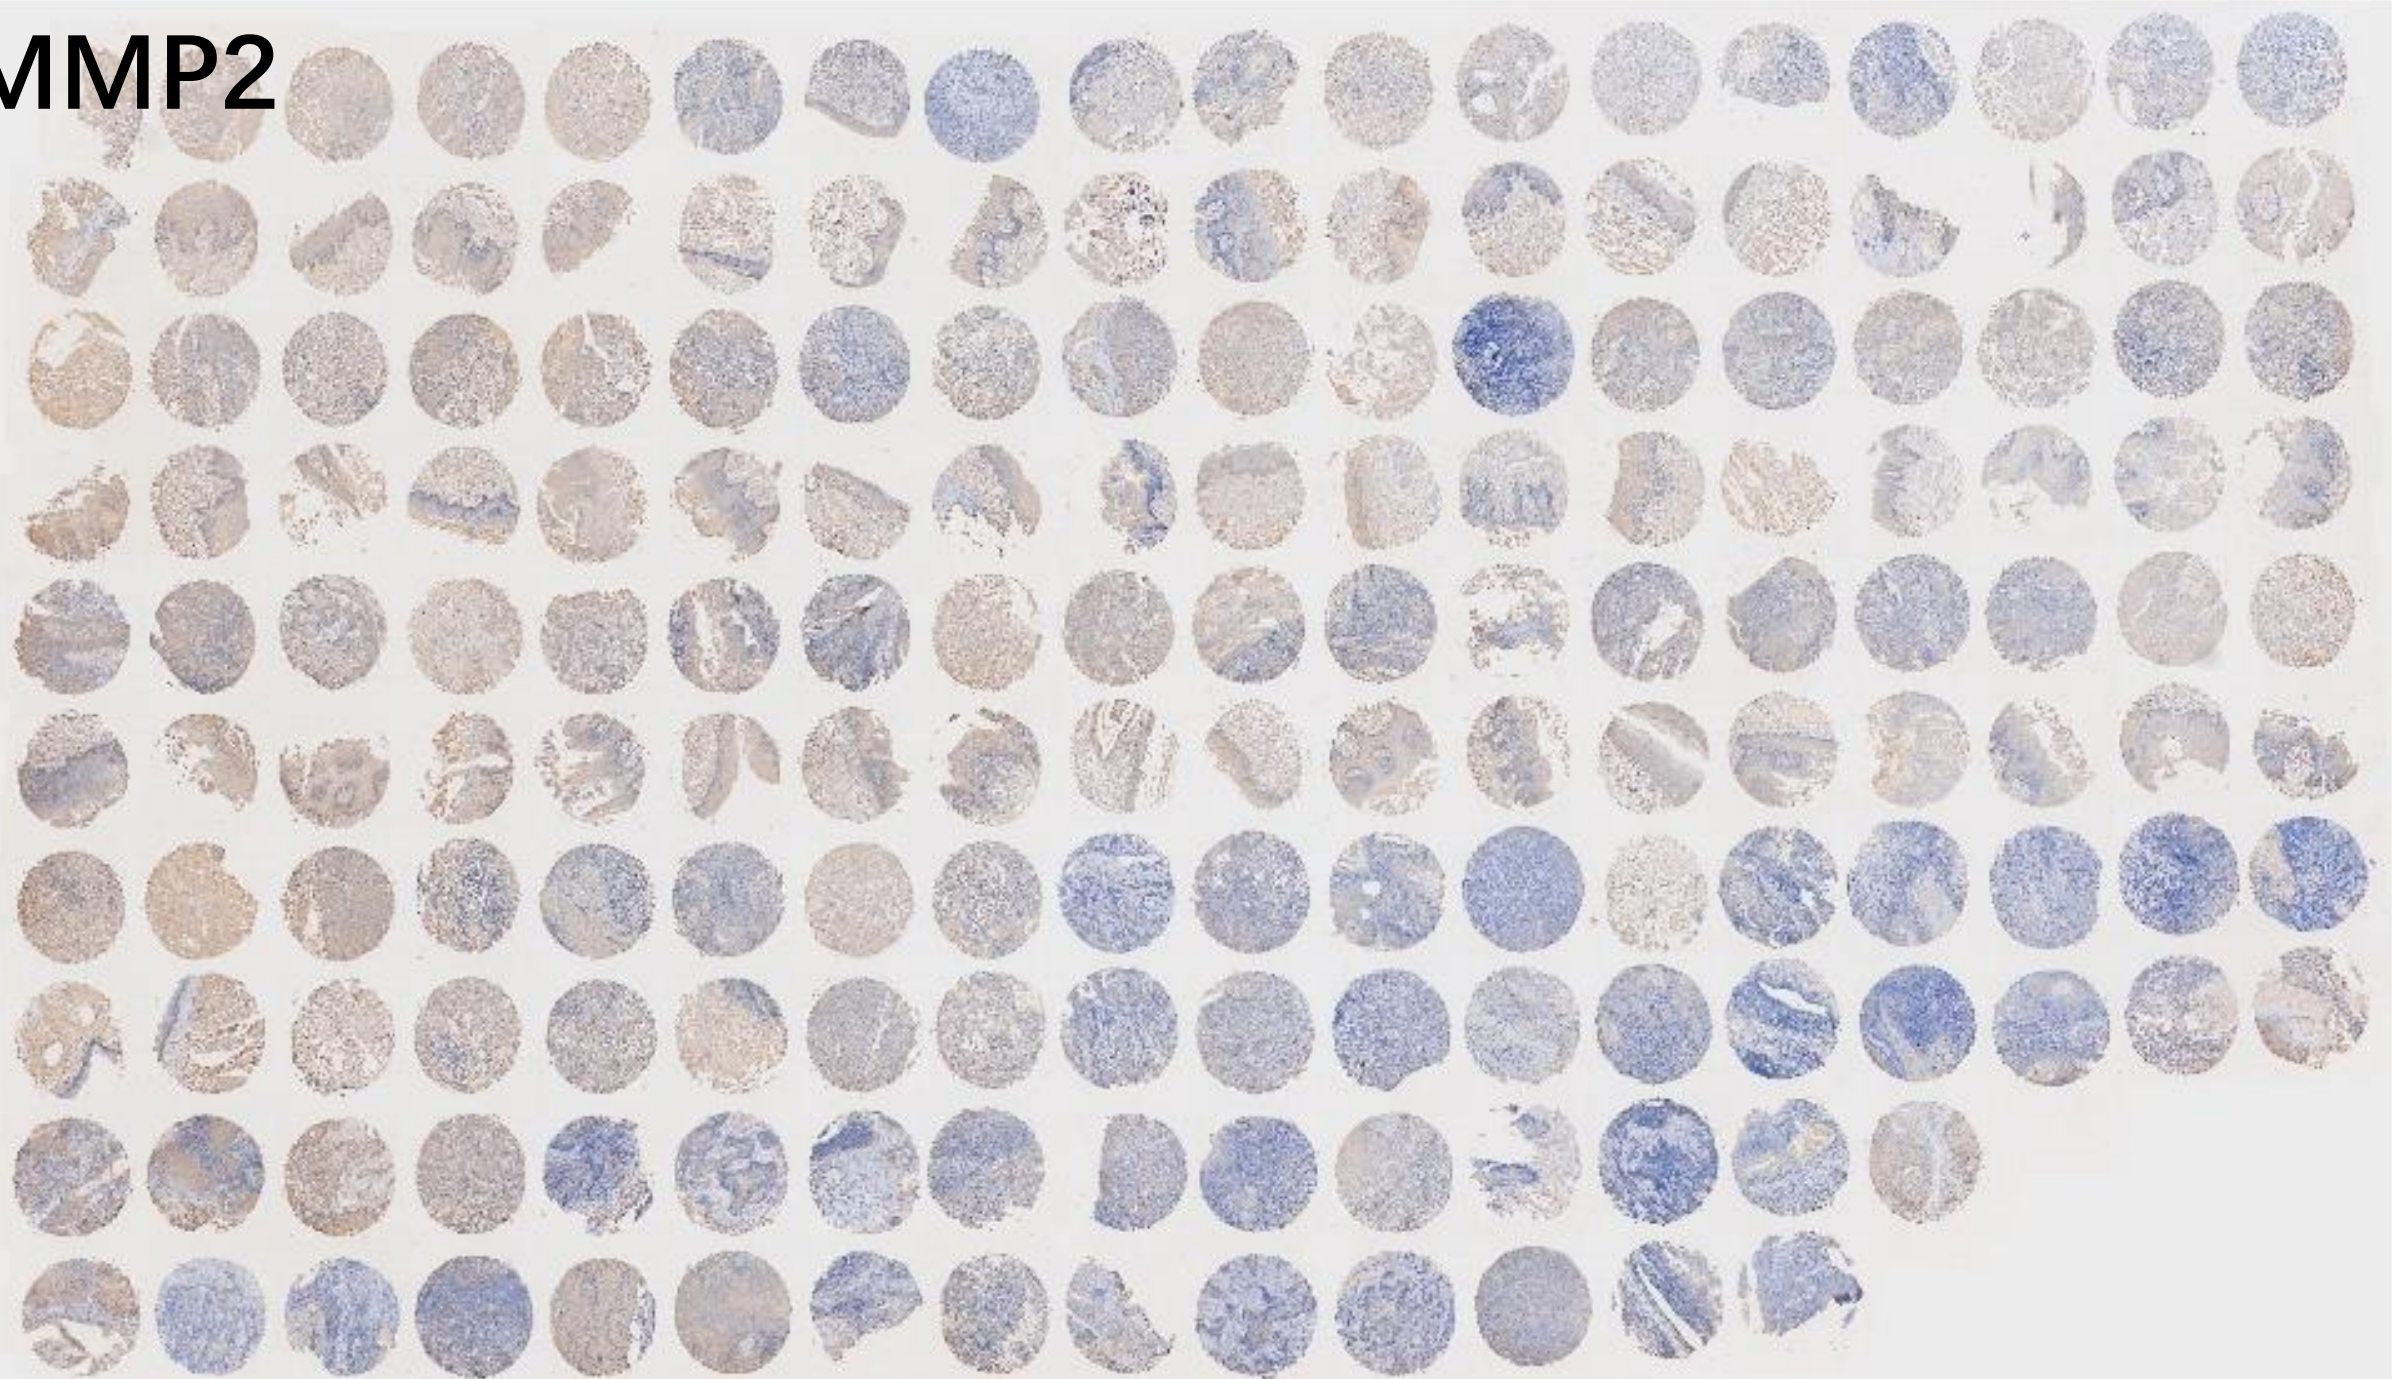

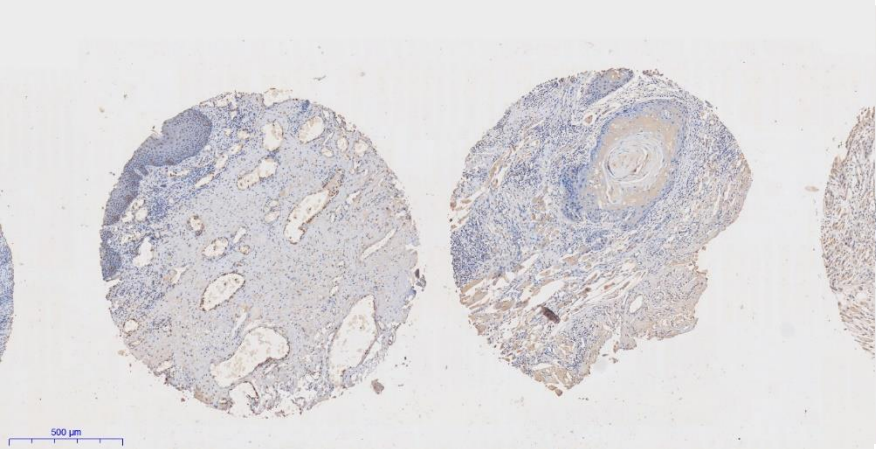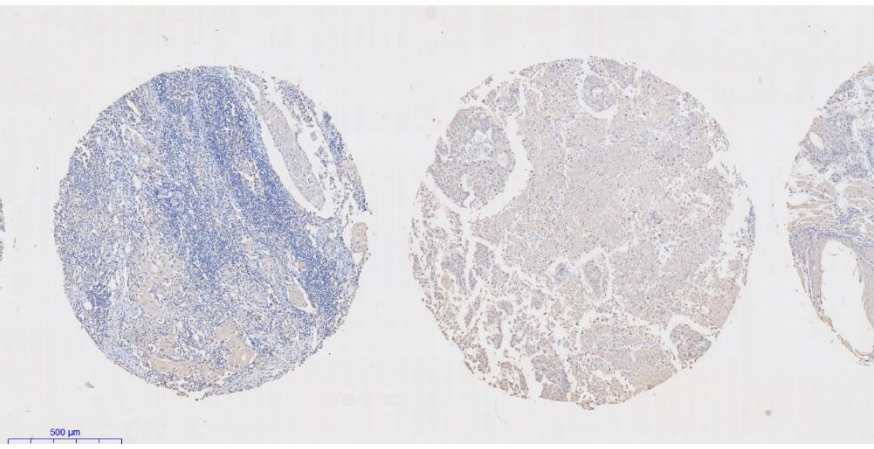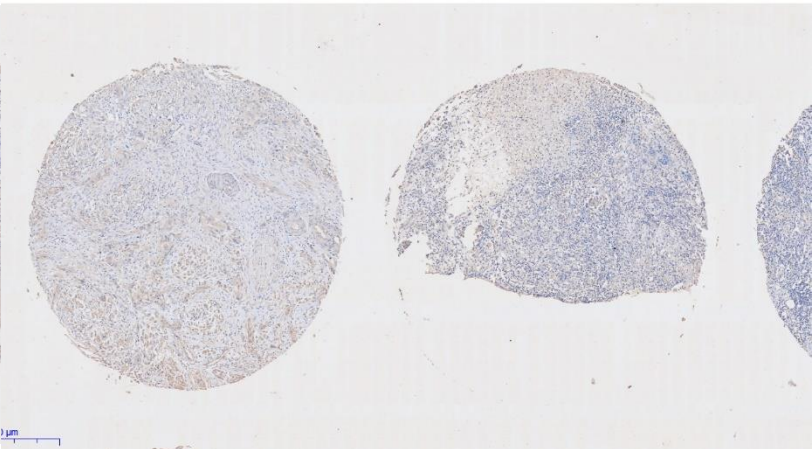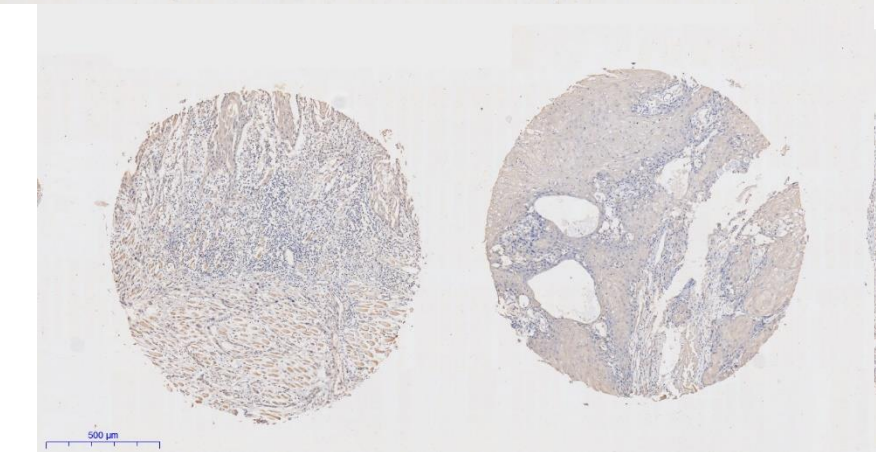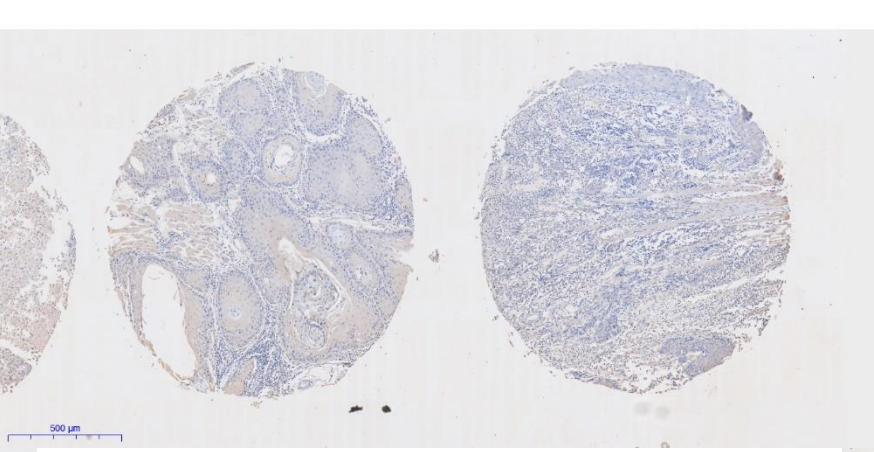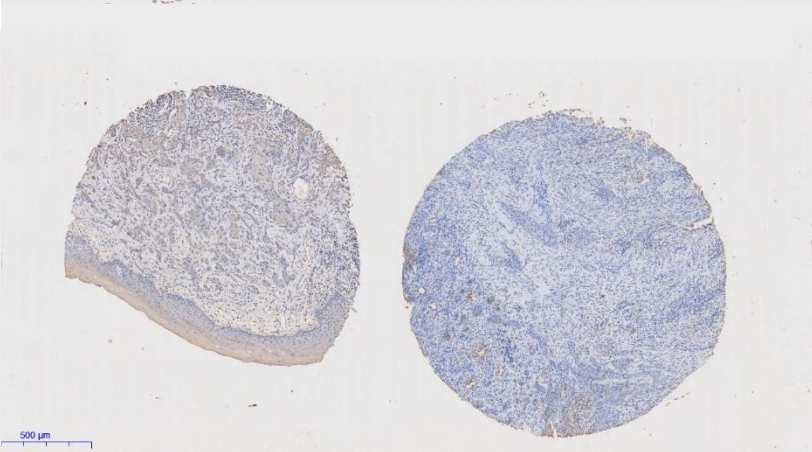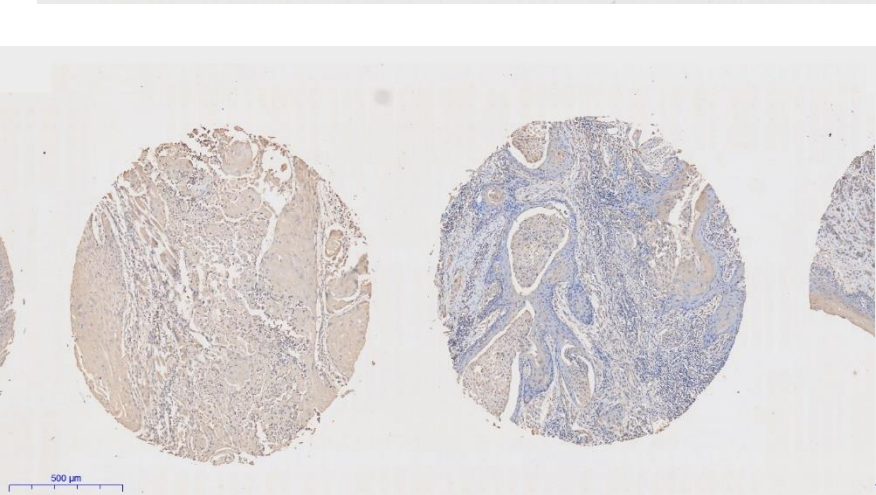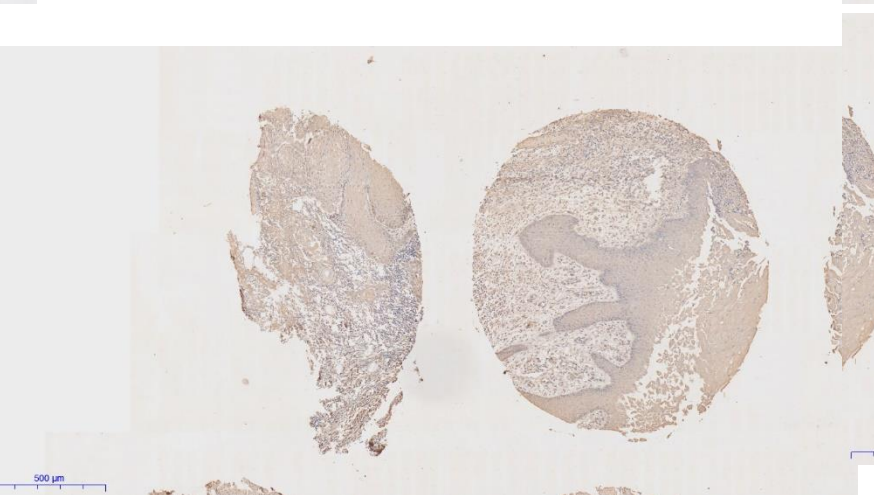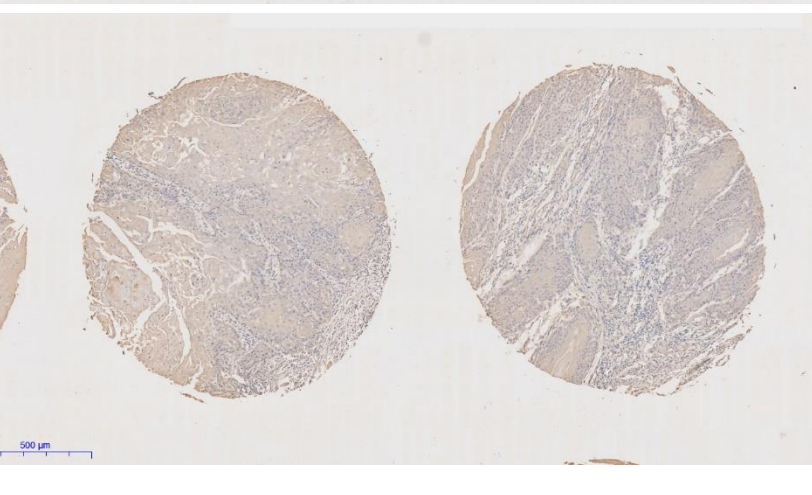

CONTROL

CONTROL

APO

APO

FIGURE5C

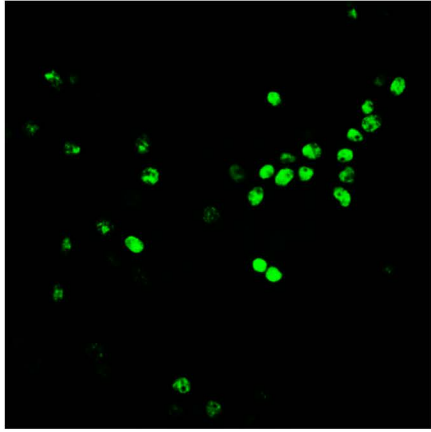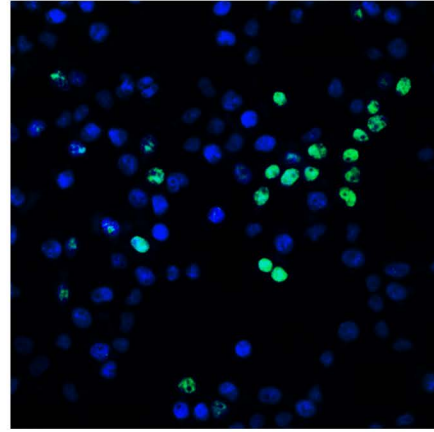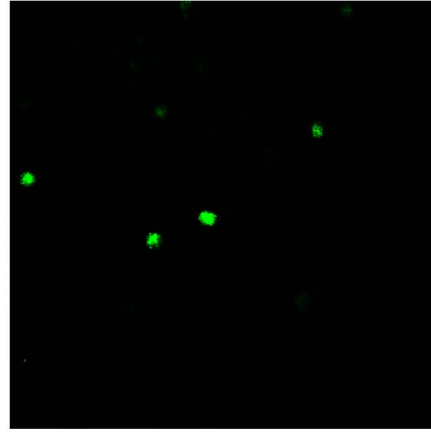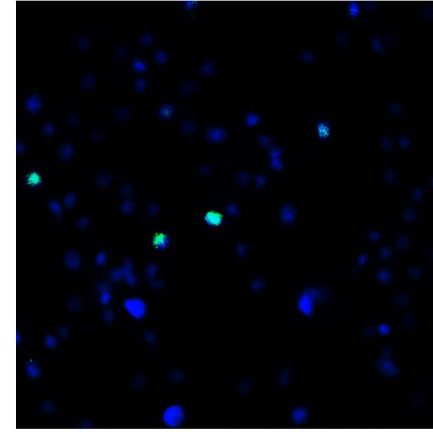

FIRST ASSAY

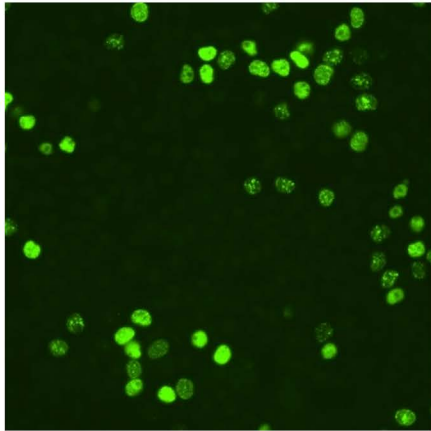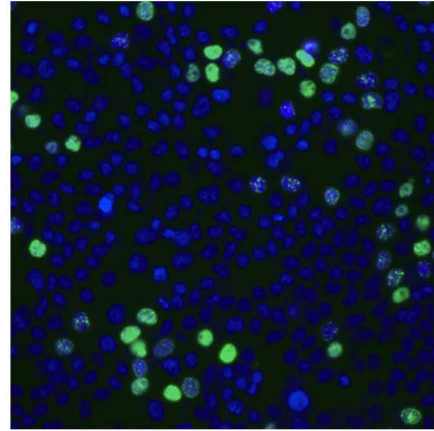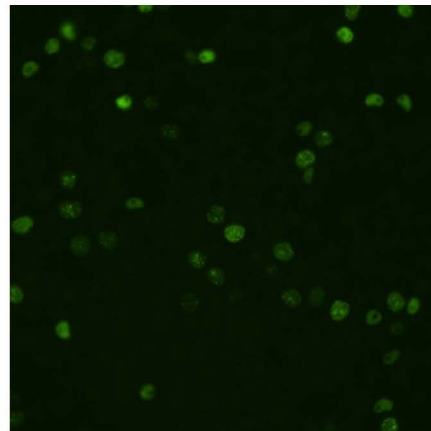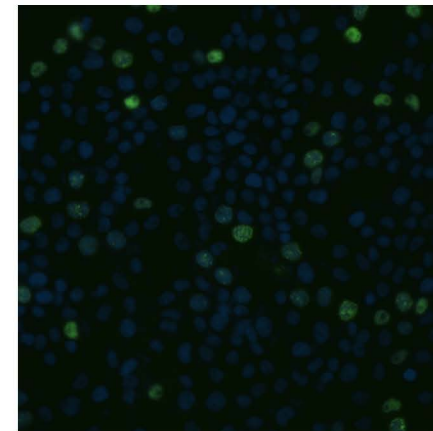

SECOND ASSAY

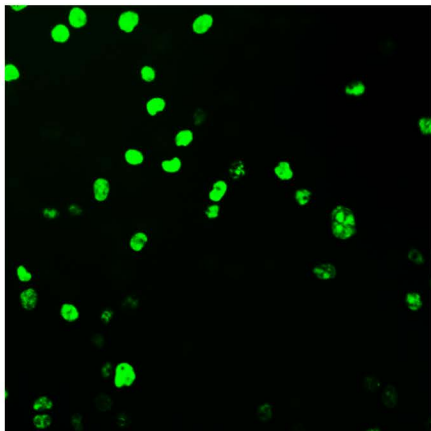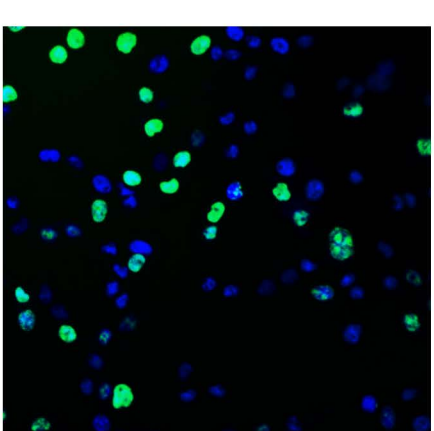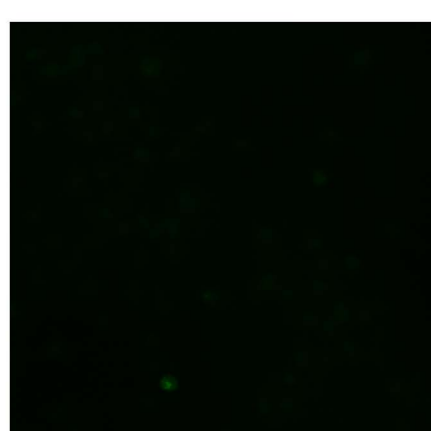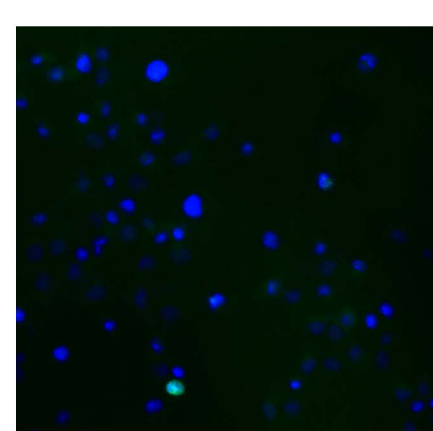

THIRD ASSAY

CONTROL

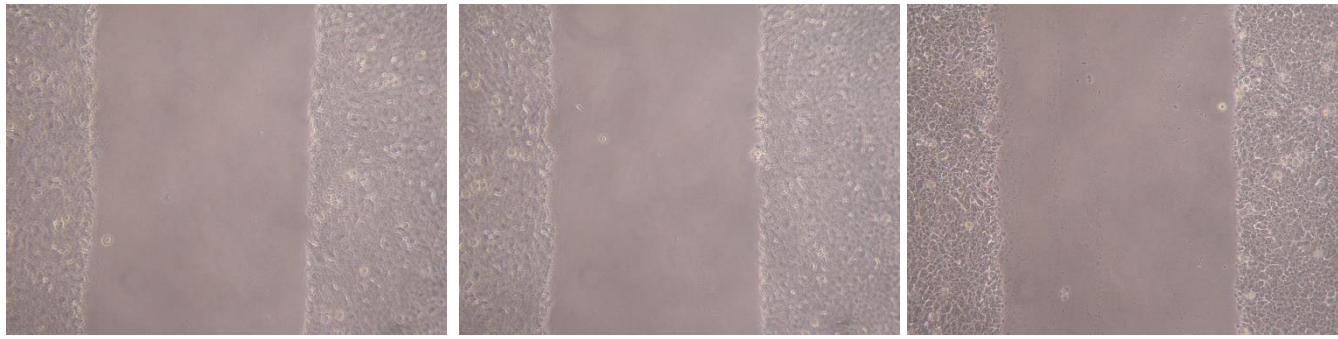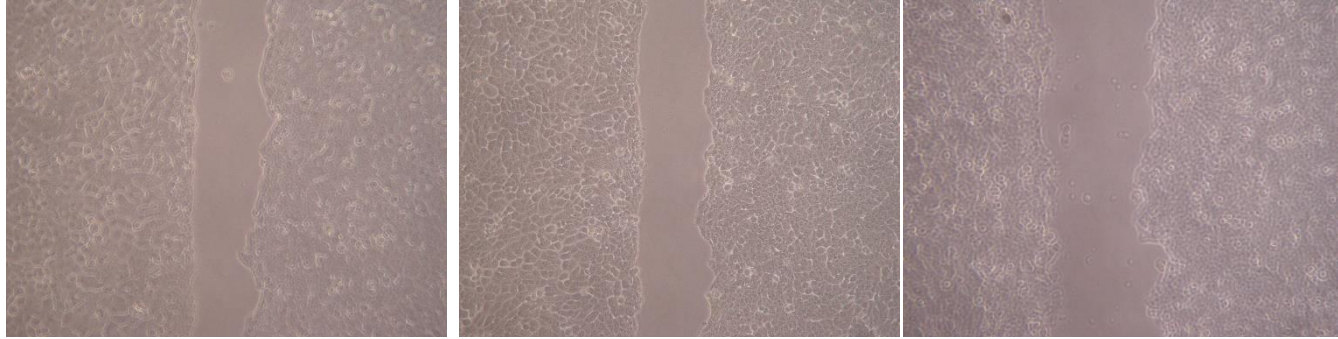

APO

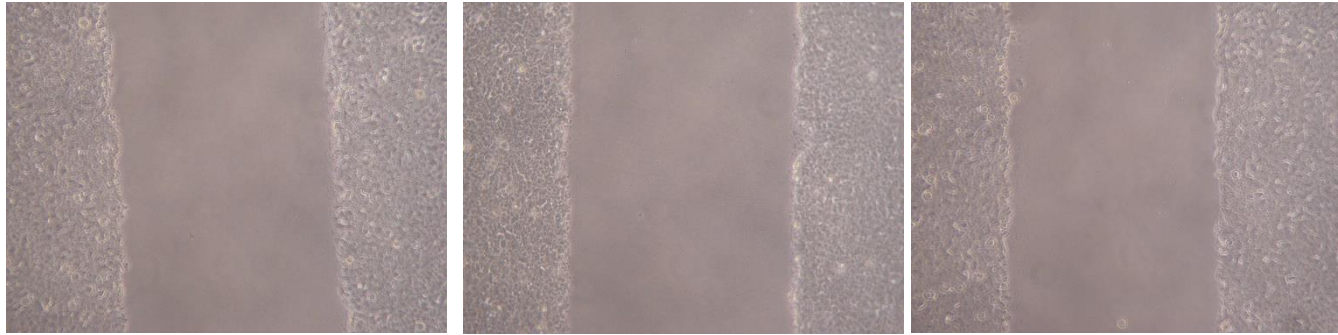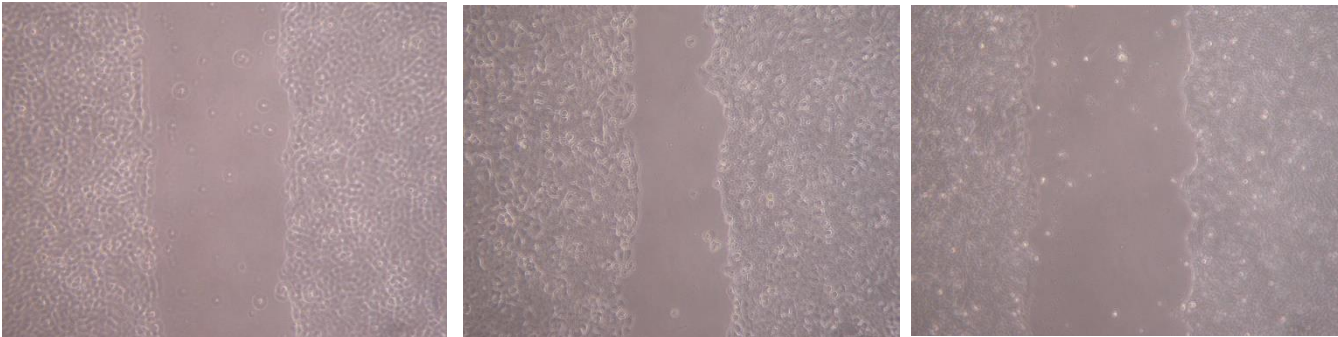

FIGURE6A

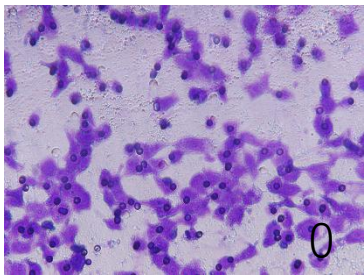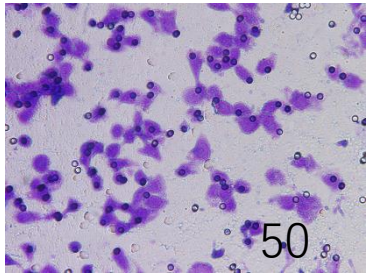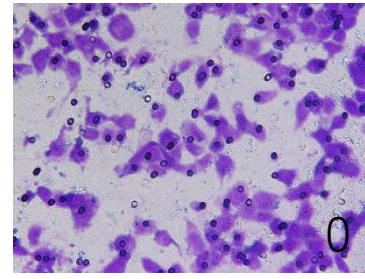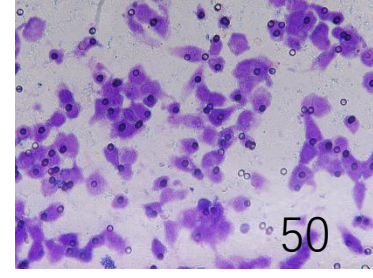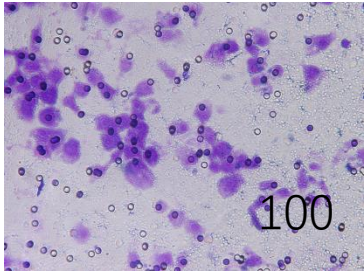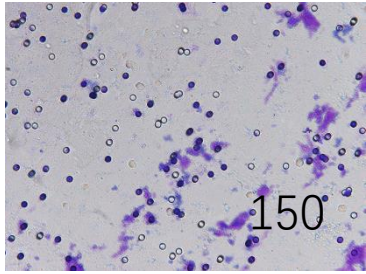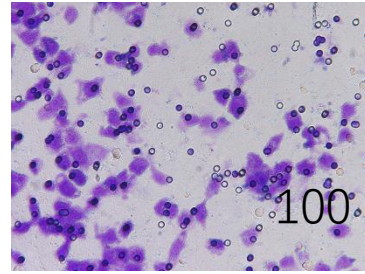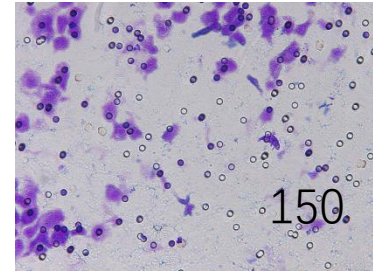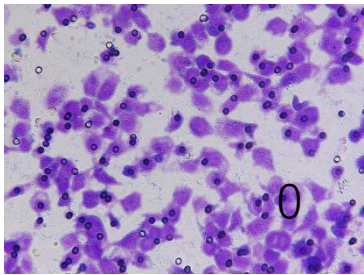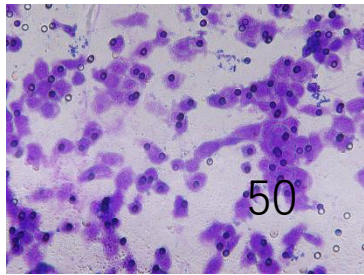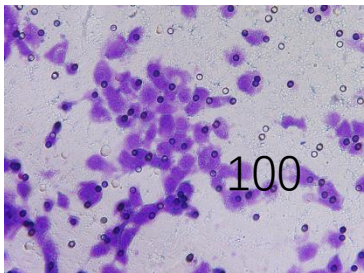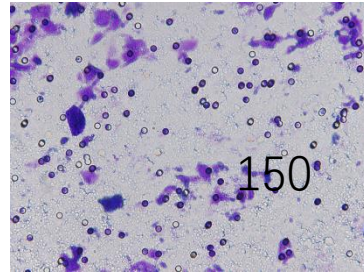

FIGURE6C
